# Supplementary material for: Life after the loss: protocol for a Danish longitudinal follow-up study unfolding life and grief after the death of a child during pregnancy from gestational week 14, during birth or in the first 4 weeks of life
Source: PubMed Central journal article supplement — BMJ Open. 2018 Dec 22;8(12):e024278. doi: 10.1136/bmjopen-2018-024278 (PMC6318761; doi:10.1136/bmjopen-2018-024278), 2018-12-22
Supplement: bmjopen-2018-024278.draft_revisions.pdf [file bmjopen-2018-024278.draft_revisions.pdf]

# BMJ Open

BMJ Open is committed to open peer review. As part of this commitment we make the peer review history of every article we publish publicly available.

When an article is published we post the peer reviewers' comments and the authors' responses online. We also post the versions of the paper that were used during peer review. These are the versions that the peer review comments apply to.

The versions of the paper that follow are the versions that were submitted during the peer review process. They are not the versions of record or the final published versions. They should not be cited or distributed as the published version of this manuscript.

BMJ Open is an open access journal and the full, final, typeset and author-corrected version of record of the manuscript is available on our site with no access controls, subscription charges or pay-per-view fees (<http://bmjopen.bmj.com>).

If you have any questions on BMJ Open's open peer review process please email [info.bmjopen@bmj.com](mailto:info.bmjopen@bmj.com)

# BMJ Open

**Life after the loss**  
**Protocol for a Danish longitudinal follow-up study unfolding**  
**life and grief after the death of a child during pregnancy**  
**from gestational week 14, during birth or in the first 4**  
**weeks of life**

|                               |                                                                                                                                                                                                                                                                                                                                                                             |
|-------------------------------|-----------------------------------------------------------------------------------------------------------------------------------------------------------------------------------------------------------------------------------------------------------------------------------------------------------------------------------------------------------------------------|
| Journal:                      | <i>BMJ Open</i>                                                                                                                                                                                                                                                                                                                                                             |
| Manuscript ID                 | bmjopen-2018-024278                                                                                                                                                                                                                                                                                                                                                         |
| Article Type:                 | Protocol                                                                                                                                                                                                                                                                                                                                                                    |
| Date Submitted by the Author: | 18-May-2018                                                                                                                                                                                                                                                                                                                                                                 |
| Complete List of Authors:     | Hvidtjørn, Dorte; Syddansk Universitet Det Sundhedsvidenskabelige Fakultet,<br>Prinds, Christina; Syddansk Universitet Det Sundhedsvidenskabelige Fakultet<br>Bliddal, Mette; University of Southern Denmark, Obstetrics and Gynaecology<br>Henriksen, Tine; Aarhus Universitet Health<br>Cacciatore, Joanne; Arizona State University<br>O'Connor, Maja; Aarhus University |
| Keywords:                     | Perinatal Death, Grief, Cohort Study, Life Change Events, Quality of health care                                                                                                                                                                                                                                                                                            |
|                               |                                                                                                                                                                                                                                                                                                                                                                             |

SCHOLARONE™  
Manuscripts

## Life after the loss

### Protocol for a Danish longitudinal follow-up study unfolding life and grief after the death of a child during pregnancy from gestational week 14, during birth or in the first 4 weeks of life

Dorte Hvidtjørn [dhvidtjoern@health.sdu.dk](mailto:dhvidtjoern@health.sdu.dk),<sup>1,2</sup> Christina Prinds [cprinds@health.sdu.dk](mailto:cprinds@health.sdu.dk),<sup>1,3</sup> Mette Bliddal

[mette.bliddal@rsyd.dk](mailto:mette.bliddal@rsyd.dk),<sup>4</sup> Tine Brink Henriksen [tine.brink.henriksen@clin.au.dk](mailto:tine.brink.henriksen@clin.au.dk),<sup>5,6</sup> Joanne Cacciatore

[icaccia@me.com](mailto:icaccia@me.com),<sup>7</sup> Maja O'Connor [maja@psy.au.dk](mailto:maja@psy.au.dk)<sup>8</sup>

1) Research Unit for Gynecology and Obstetrics, Institute of Clinical Research, University of Southern Denmark and Odense University Hospital, Odense, Denmark, 2) Unit for Perinatal Loss, Department of Gynecology and Obstetrics, Aarhus University Hospital, Aarhus, Denmark, 3) Midwifery College, University College South Denmark, Esbjerg, Denmark, 4) OPEN Odense Patient Data Explorative network, University of Southern Denmark and Odense University Hospital, Odense, Denmark, 5) Perinatal Epidemiology Research Unit, Aarhus University Hospital, Aarhus, Denmark, 6) Department of Pediatrics, Aarhus University Hospital, Aarhus, Denmark, 7) School of Social Work, Arizona State University, Arizona, USA, 8) Department of Psychology and Behavioral Sciences, Aarhus University, Aarhus, Denmark

Keywords: Perinatal Death, Grief, Cohort Study, Life Change Events, Quality of Health Care

Corresponding author: Dorte Hvidtjørn [dhvidtjoern@health.sdu.dk](mailto:dhvidtjoern@health.sdu.dk)

Word count: 3,429

## Abstract

**Introduction:** After the death of a child during pregnancy, birth or in the neonatal period, parents often experience feelings of guilt, disenfranchisement, feelings of betrayal by one's own body and envy of others. Such bereavement results in high rates of distress: psychologically, emotionally, physiologically and existentially. We collect data in a national, longitudinal cohort study to assess grief in mothers and their partners after the death of a child during pregnancy, birth, or in the neonatal period. Our aim is to achieve a general description of grief, emotional health, and existential values after pregnancy or perinatal death in a Danish population.

1  
2  
3  
4 **Methods and analysis:** The cohort comprises mothers and their partners in Denmark who lose a  
5  
6 child during pregnancy from 14 weeks gestation, during birth or in the neonatal period (4 weeks  
7  
8 post partum). We started data collection in 2015 and plan to continue until 2024. The aim is to  
9  
10 include 5,000 participants by 2024, generating the largest cohort in the field till date. Parents are  
11  
12 invited to participate at time of hospital discharge or via the Patient Associations homepage.  
13  
14  
15 Socio-demographic and obstetric variables are collected. Validated psychometric measures  
16  
17 covering attachment, continuing bonds, posttraumatic stress, prolonged grief, perinatal grief and  
18  
19 existential values were chosen to reach our aim.  
20  
21

22 **Ethics and dissemination:** We use web-based questionnaires distributed at three specific time  
23  
24 points during the first 13 months after the loss. The study was approved by The Danish National  
25  
26 Data Protection Agency (No. 18/15684, October 7, 2014).  
27  
28  
29  
30  
31

## 32 **Strengths and limitations**

- 33  
34  
35 • Population based longitudinal study targeting at 5,000 participants by 2024 (by January  
36  
37 2018, 300 completed questionnaires and ongoing)
- 38  
39  
40 • Unfolding grief and emotional experiences in the first 13 months after the loss by multiple  
41  
42 validated, self-administered questionnaires
- 43  
44  
45 • Multi-professional approach including psychologist, midwives, perinatal epidemiologists  
46  
47 and anthropologists
- 48  
49 • A response rate around 50%
- 50  
51  
52  
53  
54  
55  
56  
57  
58  
59  
60

## Introduction

When we lose a person we love, we grieve. Grief is a simultaneously universal phenomenon and an entirely individual experience. Yet, grief is also a cultural phenomenon, influenced by alternating normativity and beliefs over time (Kofod, 2017). In contemporary Western countries, grief and suffering are increasingly embedded in medical and psychiatric paradigms (Cacciatore & Ruby, 2015; Lacasse & Cacciatore, 2014). For example, the World Health Organization (WHO, 2016) is preparing criteria for a new diagnosis termed Prolonged Grief Disorder (PGD), anticipated to be introduced in the diagnostic manuals for mental disorders in 2018 (WHO, 2016). Discussions about how to define pathological grief are actualized both in professional settings and the broader population (Maccallum, Malgaroli, & Bonanno, 2017; Maciejewski, Maercker, Boelen, & Prigerson, 2016; Politikken, 2016; Thieleman & Cacciatore, 2013). There is a general agreement that the majority of bereaved individuals eventually, and without professional interventions, will arrive at a new emotional equilibrium after loss. According to Litz et al only a minority will experience PGD, suffering significant impairment in important areas of daily life functioning to a disabling degree more than six months after loss (Litz, 2014). A recent meta-analysis found a prevalence of PGD in approximately 10% in bereaved adults, however only a small fraction of the bereaved in these 14 studies included bereaved parents (Lundorff, Holmgren, Zachariae, Farver-Vestergaard, & O'Connor, 2017).

Thus, it is not clear how well these findings apply to the grieving process among parents after the death of a baby. Their grieving process might differ from grief processes in general, and a larger proportion may experience the symptoms of PGD. Put differently, a longer period of intense grief may be the normal response for parents grieving after the death of a baby. In this longitudinal, follow-up study we aim to assess grief among mothers and partners after the

1  
2  
3  
4 loss of a child during pregnancy from gestational week 14, during birth or in the neonatal period (4  
5  
6 weeks post partum).  
7

### 8 9 **The nature of perinatal grief**

10  
11 The death of an unborn or newborn child can be a life-changing and devastating experience  
12  
13 (Krosch & Shakespeare-Finch, 2017). A growing body of literature has assessed the nature of grief  
14  
15 among parents who lose a child during pregnancy, birth, or in the neonatal period. A paper from  
16  
17 2016 presenting best practice points based on published research including 144 studies shows  
18  
19 that the majority of studies on parental loss are from North America, followed by Great Britain,  
20  
21 Sweden and Australia (Burden et al., 2016). These studies demonstrate that loss from miscarriage,  
22  
23 intrauterine fetal death, termination of pregnancy due to fetal anomaly (TOPFA) or neonatal death  
24  
25 often involves feelings of guilt, disenfranchisement, feelings of betrayal by ones body and envy of  
26  
27 others (Burden et al., 2016; Toedter, Lasker, & Alhadeff, 1988). Parents lose the prospect of an  
28  
29 entire life with the child and all the moments they dreamt of sharing (Michon, Balkou, Hivon, &  
30  
31 Cyr, 2003b). Furthermore, bereaved parents of young babies who die have few mementoes of the  
32  
33 child, none or few pictures and a very short narrative (Cacciatore & Flint, 2011). The loss has been  
34  
35 called “invisible” and especially if the child died before or during birth family and friends might not  
36  
37 regard the child’s identity as real. They may also be reluctant to talk about the dead child, leading  
38  
39 to emotional isolation complicating the grief process (Burden et al., 2016; Hendrickson, 2009;  
40  
41 Humphrey & Cacciatore, 2011). Some parents, mostly mothers, describe a loss of self-esteem  
42  
43 (Hendrickson, 2009; Meert, Thurston, & Briller, 2005; Michon et al., 2003b; Wonch Hill,  
44  
45 Cacciatore, Shreffler, & Pritchard, 2017). For the mother, the bodily unity with the dead child  
46  
47 might be still another stressful element (Cacciatore, 2013) and for parents choosing TOPFA  
48  
49  
50  
51  
52  
53  
54  
55  
56  
57  
58  
59  
60

1  
2  
3  
4 feelings of guilt and doubt can further thwart the grief process (Korenromp et al., 2007; Maguire  
5  
6 et al., 2015).  
7

### 8 9 **Outcomes of pregnancy and perinatal bereavement**

10  
11 The outcomes of pregnancy and perinatal bereavement are also assessed in international studies,  
12  
13 finding high rates of psychological and emotional distress and diagnoses including; depression,  
14  
15 general anxiety disorder, post traumatic stress disorder (PTSD), sense of failure, long-term guilt  
16  
17 and intense grief for more than 2 years (Badenhorst & Hughes, 2007; Burden et al., 2016;  
18  
19 Cacciatore, 2013; Michon, Balkou, Hivon, & Cyr, 2003a). Generally, measured by similar  
20  
21 instruments mothers appear to be more afflicted than fathers (Michon et al., 2003a; Song, Floyd,  
22  
23 Seltzer, Greenberg, & Hong, 2010; Stroebe, Schut, & Stroebe, 2007). One review of 11 studies  
24  
25 assessed the association between type of loss and mental health and found lower or comparable  
26  
27 levels of depression, anxiety and PTSD among mothers losing a child from TOPFA and mothers  
28  
29 losing a child from stillbirth (Steinberg, 2011). The risk for PTSD was assessed in a systematic  
30  
31 review of 48 studies. They found an increasing risk of PTSD related to higher gestational age at  
32  
33 time of loss and certain socio-demographic and psychosocial characteristics predicting PTSD  
34  
35 (Daugirdaite, van den Akker, & Purewal, 2015). In one study including 344 bereaved mothers, the  
36  
37 PTSD risk was 7 times higher in mothers with a perinatal death than in the comparison group of  
38  
39 mothers with a live birth (Gold, Leon, Boggs, & Sen, 2016). A review of 18 studies on self-blame,  
40  
41 guilt, and shame among bereaved parents (including stillbirths and the loss of older children)  
42  
43 reported a high prevalence of all three states and an association with grief intensity (Duncan &  
44  
45 Cacciatore, 2015). Higher mortality rates from natural causes among mothers who experienced a  
46  
47 perinatal death were found in two large population based studies established on register data  
48  
49 (Calderon-Margalit et al., 2007; Hvidtjorn, Wu, Schendel, Thorlund Parner, & Brink Henriksen,  
50  
51  
52  
53  
54  
55  
56  
57  
58  
59  
60

1  
2  
3  
4 2015). Explorations of subsequent pregnancy following the loss suggest that some mothers are at  
5  
6 increased risk of depression and anxiety (Blackmore et al., 2011; DeBackere, Hill, & Kavanaugh,  
7  
8 2008). Patient-centered compassionate care is valued by the parents (Cacciatore, 2013) but we  
9  
10 identified no studies assessing the long term effect of the type of care provided at the hospital.  
11  
12

13 Despite the above-mentioned outcomes, some bereaved parents describe the loss as  
14  
15 a pivotal event in a broader and more life-changing sense; grief can make an existential imprint in  
16  
17 the bereaved leading potentially to both posttraumatic growth as well as posttraumatic stress,  
18  
19 which is often mentioned in the literature (Cacciatore & Bushfield, 2007; Guldin, 2014; Krosch &  
20  
21 Shakespeare-Finch, 2017; Oginska-Bulik & Kobylarczyk, 2017).  
22  
23  
24  
25  
26  
27

### 28 **The theoretical framework**

29  
30 In this section we explicate the theoretical framework, which piloted the preparation of the  
31  
32 questionnaires and the forthcoming data analyses.  
33  
34

35 In general, unexpected and traumatic loss increases the risk of impaired physical and  
36  
37 emotional health in the bereaved, and the loss of a child in the perinatal period will most often be  
38  
39 unexpected and traumatic (Stroebe et al., 2007).  
40

41 Attachment style is shown to be related to adaption to the loss with more intense  
42  
43 and enduring symptoms of grief and depression, complicated grief reactions, and decreased  
44  
45 resilience in parents with insecure attachment style (on both avoidance and anxiety attachment)  
46  
47 (Jaaniste, Coombs, Donnelly, Kelk, & Beston, 2017; Wijngaards-de Meij et al., 2007). The  
48  
49 attachment theory was introduced by John Bowlby in the 1970s and provides a unique way to  
50  
51 characterize individual differences in reactions to loss because it illuminates the nature of a  
52  
53 person's relationships and adjustment in situations of separation (Wijngaards-de Meij et al.,  
54  
55  
56  
57  
58  
59  
60

1  
2  
3  
4 2007). The theory suggests different styles of attachment, developed through the early parent-  
5  
6 child relationship, which will form the basis for responses to emotionally distressing situations  
7  
8 such as bereavement (Bowlby, 1997).  
9

10 The Dual Process Model (DPM) has become a widespread model in understanding  
11  
12 grief in contemporary Western countries (Stroebe & Schut, 1999). The DPM of coping with  
13  
14 bereavement emphasizes two concurrent types of stressors and coping processes: loss-orientation  
15  
16 and restoration-orientation. It underlines that bereaved individuals often oscillate between these  
17  
18 two processes throughout the course of bereavement, and a standstill in one of the two processes  
19  
20 might be associated with prolonged grief (Stroebe & Schut, 1999).  
21  
22  
23

24 In Freud's classic grief work theory, detachment from the decedent is emphasized as  
25  
26 fundamental for adaption to the loss and this idea has influenced the attitude of bereaved  
27  
28 individuals for nearly 100 years. This philosophy is now challenged by the continuing bonds theory  
29  
30 (Klass, 1997). Continuing bonds has been defined as "*the presence of an on-going inner*  
31  
32 *relationship with the deceased person by the bereaved individual*" representing diverse behaviors  
33  
34 (Stroebe & Schut, 2005). The literature reveals contradictory findings of the role of continuing  
35  
36 bonds in bereavement, with certain types of continuing bonds associated with both good and poor  
37  
38 adjustment across different studies and moreover influenced by the social and cultural acceptance  
39  
40 of the survivors continued relationship with the deceased (Root & Exline, 2014).  
41  
42  
43  
44

45 When a child dies at birth the natural order of life is disturbed and assumptive  
46  
47 worldviews shatter, challenging three primary core beliefs relating to benevolence,  
48  
49 meaningfulness of the world and worthiness of the self, and requiring a reorganization of  
50  
51 worldviews (Janoff-Bulman, 1992; Krosch & Shakespeare-Finch, 2017). The disruption of core  
52  
53 belief might lead to changes in philosophy of life or spiritual beliefs (Krosch & Shakespeare-Finch,  
54  
55  
56  
57  
58  
59  
60

1  
2  
3  
4 2017). This change can go in many directions and literature shows incongruent findings in how  
5  
6 religiousness and spirituality relate to bereavement outcomes (Jaaniste et al., 2017).  
7  
8

### 9 **The Danish setting**

10  
11 There are huge dissimilarities between the health care systems in Denmark and North America  
12  
13 from where most of the studies originate. Danish health care is public and free of charge.  
14  
15 Furthermore, there are different approaches in the way health care professionals support  
16  
17 bereaved parents in creating a relationship with their dead child and acknowledge their grief  
18  
19 (Burden et al., 2016; Møller, 2015). Additionally, patient centered psychosocial care is standard in  
20  
21 Danish hospitals while prescription of psychiatric medication appears to be much more common in  
22  
23 the U.S. (Lacasse & Cacciatore, 2014; Møller, 2015). Specifically, when we explore existential  
24  
25 values and spiritual beliefs, findings from more religious countries as the U.S. have poor external  
26  
27 validity in a secularized country as Denmark (Hvidt, Hvidtjorn, Christensen, Nielsen, &  
28  
29 Sondergaard, 2017; Prinds, Hvidtjorn, Mogensen, Skytthe, & Hvidt, 2014; Prinds, Hvidtjorn,  
30  
31 Skytthe, Mogensen, & Hvidt, 2016). Hence studies in a Danish context can expand our knowledge  
32  
33 on grief after perinatal death.  
34  
35  
36  
37  
38

### 39 **Aim**

40  
41  
42 In this longitudinal national follow-up study, we aim to assess grief symptoms among mothers and  
43  
44 partners after the loss of a child during pregnancy, birth, or in the neonatal period. We aim to  
45  
46 achieve a general description of grief, emotional health, and existential values after pregnancy or  
47  
48 neonatal loss in a Danish population.  
49  
50

51 To achieve our purpose, we based the study on the following overall research  
52  
53 questions:  
54  
55  
56  
57  
58  
59

- 1
- 2
- 3
- 4 1. How does the process of grief change in the first 13 months in bereaved parents?
- 5
- 6 2. What gender differences exist in the grief process?
- 7
- 8 3. How is attachment style associated with continuing bonds and grief?
- 9
- 10 4. Does gestational age at time of death influence grief?
- 11
- 12 5. Does the loss change existential or spiritual values or practices?
- 13
- 14
- 15
- 16
- 17
- 18
- 19
- 20
- 21

## 22 **Methods and analysis**

23  
24 This nationwide population based cohort study comprises mothers and partners who lost a child  
25 during pregnancy after gestational week 14, during or after birth or in the neonatal period. We  
26 include miscarriages, termination of pregnancy due to fetal anomaly (TOPFA), stillbirths and  
27 neonatal deaths. In Denmark, a regional counsel can grant permission to perform TOPFA until GA  
28 week 22; stillbirth is defined as intrauterine fetal death from GA week 22. We use web-based  
29 questionnaires distributed at three specific time points in the first 13 months after the loss. Study  
30 data were collected and managed using REDCap electronic data capture tools hosted at University  
31 of Southern Denmark (Harris et al., 2009). The mother and her partner are asked to reply  
32 questionnaires individually. The data collection started in the Region of Southern Denmark in  
33 January 2016, in the Region of Central Jutland in January 2017, and in Summer 2018 we expanded  
34 the study to cover nationally and included the remaining three regions in Denmark. Data collection  
35 was permitted by The Danish Data Protection Agency until January 2025.

36  
37  
38  
39  
40  
41  
42  
43  
44  
45  
46  
47  
48  
49  
50  
51  
52 In the Regions of Southern Denmark and Central Jutland, the parents receive short  
53 written and verbal information from health care professionals about the study before leaving  
54  
55  
56  
57  
58  
59  
60

1  
2  
3  
4 hospital. Subsequently they receive the first e-mail from the project manager 4 to 8 weeks after  
5  
6 the loss with comprehensive information about the study and a link to the questionnaire. In the  
7  
8 rest of Denmark, parents are invited to participate through announcements on the homepage for  
9  
10 the national patient organization “Landsforeningen Spædbarnsdød”; a patient organization  
11  
12 offering free counseling to perinatally bereaved families. Via a link at the homepage, parents sign  
13  
14 up with an e-mail address and receive comprehensive information and a questionnaire. Access to  
15  
16 the study questionnaire is given only when the parent have consented participation. The  
17  
18 questionnaire is sent to the parents at three time points: 4 to 8 weeks, 7, and 13 months after the  
19  
20 loss. If not returned, each questionnaire is followed by reminders, the first one after 3 weeks and  
21  
22 the second one after 6 weeks of granting access to the questionnaire. Due to an initial low  
23  
24 response rate, we further introduced a verbal reminder in January 2018 via a telephone call made  
25  
26 by a research assistant with experience in grief counselling. In the region of Southern Denmark  
27  
28 basic information (age, date of birth, date of death, gestational age at birth, parity and type of  
29  
30 loss) on all potential participants are registered, allowing us to conduct a dropout analysis.  
31  
32  
33  
34  
35  
36

### 37 **The questionnaires**

38  
39 The survey was constructed with a combination of basic information in relation to socio-  
40  
41 demographics and obstetric variables, state-of-the-art psychometrical testing by validated  
42  
43 questionnaires and ad hoc questions specifically prepared for this study. We included seven  
44  
45 psychometric scales addressing the different parts of our research questions (Table 1).  
46  
47  
48

### 49 **Socio-demographic variables**

50  
51 We included the following socio-demographic variables: age, sex of partner (to identify female  
52  
53 partners), marital status (married, co-habiting, single), educational level (basic school (9–10 years  
54  
55  
56  
57  
58  
59  
60

1  
2  
3  
4 of education), intermediate length education (11–16 years of education) and university education  
5  
6 (17 or more years of education), present occupation and occupation before the loss (on maternity  
7  
8 leave, on sick leave, unemployed, at work or studying).  
9

### 10 11 **Obstetric and organizational variables**

12  
13  
14 The following obstetrical variables were included: previous perinatal loss, parity, assisted  
15  
16 reproduction, single- or multiple pregnancies, type of loss (missed abortion, miscarriages, TOPFA,  
17  
18 intrauterine fetal death, death after birth), mode of delivery (vaginal vs. cesarean section),  
19  
20 gestational age at the time of loss, admission to the neonatal intensive care unit (NICU) and age of  
21  
22 child if death occurred after birth, and seeing and holding the dead child. Organizational variables  
23  
24 were: hospital and type of department to which the couple were admitted, experienced quality of  
25  
26 professional support (midwives, doctors, nurses, social worker, undertaker, religious person  
27  
28 (chaplain, imam or other) and patient organization).  
29  
30  
31  
32

### 33 **Psychometric scales**

34  
35 To measure attachment style we included a version of "The Experience in Close Relationships  
36  
37 Scale – revised, short form (ECR-R)" (Fraley, Heffernan, Vicary, & Brumbaugh, 2011) modified to  
38  
39 bereaved samples. The participants were asked to express how much they agreed or disagreed  
40  
41 with 12 statements concerning how they feel in emotionally intimate relationships on a seven-  
42  
43 point scale ranging from highly disagree to strongly agree. Scores for attachment related anxiety  
44  
45 and attachment related avoidance were obtained by averaging a person's scores (0 to 6) on each  
46  
47 of the 12 items.  
48  
49  
50

51 We used the Perinatal Grief Scale (PGS), developed in 1988 to construct a  
52  
53 comprehensive measure of perinatal grief to facilitate comparison among findings in the field  
54  
55  
56  
57  
58  
59  
60

1  
2  
3  
4 (Ritsher & Neugebauer, 2002; Toedter et al., 1988). The scale was constructed to address the  
5  
6 potential disparities between grief in general and perinatal grief (Toedter et al., 1988). The PGS  
7  
8 contains 33 statements covering dimensions as e.g. guilt, loneliness, and jealousy with an option  
9  
10 of answering on a five-point scale ranging from highly disagree to strongly agree. The PGS has  
11  
12 good internal consistency (alpha 0.95) (Toedter, Lasker, & Janssen, 2001). A clinical cut-off of 91  
13  
14 has been established for the PGS, where greater scores indicate a high level of perinatal grief  
15  
16 (Toedter et al., 2001).  
17  
18

19  
20 To assess the process of bereavement within the dual process model paradigm, the  
21  
22 Inventory of Daily Widowed Life (IDWL) was used (Caserta & Lund, 2007). The IDWL was  
23  
24 developed studying a group of widows in 2007. However, items in the scale could be adaptable to  
25  
26 other losses and relationships with some modifications (Caserta & Lund, 2007). The inventory  
27  
28 comprises 15 items on doings, thoughts, or feelings and the participants state how often within  
29  
30 the last week they have been preoccupied by each task by choosing one of four categories; seldom  
31  
32 or never, sometimes, quite often and nearly all the time.  
33  
34  
35

36 We also included the Post Traumatic Stress Disorder Checklist (PCL-PTSD) (Blevins,  
37  
38 Weathers, Davis, Witte, & Domino, 2015). The PCL was developed in 1990 and comprises 17 items  
39  
40 corresponding to the PTSD symptom criteria in the Diagnostic and Statistical Manual of Mental  
41  
42 Disorders (5th ed.) (Blevins et al., 2015). Respondents indicate how much they have been  
43  
44 bothered by each PTSD symptom over the past month, using a 5-point scale ranging from not at all  
45  
46 to extremely much (scores 1 to 5).  
47  
48  
49

50 To address the question of continuing bonds, we included “The Two Track  
51  
52 Bereavement Questionnaire on Life Following Loss” (Rubin et al., 2009). This model aims to devote  
53  
54  
55  
56  
57  
58  
59  
60

balanced attention to two domains of the bereavement experience: the nature of biopsychosocial functioning and the nature of the ongoing relationship to the deceased.

In order to assess the likelihood of symptoms related to the diagnosis of PGD within this cohort, we incorporated Prolonged Grief Disorder-13 (Prigerson et al., 2009). The scale includes 13 items related to feelings, thoughts and doings. High scores within the specific items associated with severe functional impairment fulfill the criterion for prolonged grief disorder.

We also included questions from “The European Value Survey” (Survey, 2006), supplemented by questions on worldviews, existential values, and spiritual beliefs developed for a study on existential meaning and motherhood (Prinds et al., 2014). The questions regarded alterations in meaning and purpose in life, religious faith, belief in afterlife, church attendance, prayer, and meditation and whether there was a need (met or unmet) for discussing these existential matters with others.

**Table 1.** Overview of domains and psychometric scales included in the three questionnaires, showing the number of questions within the specific scales at specific times.

| Scales                                                                                     | Questionnaire 1   | Questionnaire 2 | Questionnaire 3  |
|--------------------------------------------------------------------------------------------|-------------------|-----------------|------------------|
| <b>Time since the loss</b>                                                                 | <b>24-60 days</b> | <b>7 months</b> | <b>13 months</b> |
| Socio-demographic and obstetric variables                                                  | 22                |                 |                  |
| The Inventory of Daily Widowed Life (IDWL) (Caserta & Lund, 2007)                          | 17                | 17              | 17               |
| The Two Track Bereavement Questionnaire on Life Following Loss (TTBQ) (Rubin et al., 2009) | 60                | 60              | 60               |
| The Experience in Close Relationships Scale – revised,                                     |                   |                 |                  |

|                                                                                                       |            |            |            |
|-------------------------------------------------------------------------------------------------------|------------|------------|------------|
| short form (ECR-R) (Fraleay, Heffernan, Vicary, & Brumbaugh, 2011)                                    | 12         |            |            |
| Selected questions from The European Value Survey (Survey, 2006)                                      | 23         |            | 23         |
| Prolonged Grief Disorder (PG-13) (Prigerson et al., 2009)                                             | 13         | 13         | 13         |
| Post Traumatic Stress Disorder Checklist (PCL-PTSD) (Blevins, Weathers, Davis, Witte, & Domino, 2015) | 18         | 18         | 18         |
| Perinatal Grief Scale (PGS), Toedter et al., 1988)                                                    | 33         | 33         | 33         |
| <b>Total number of questions</b>                                                                      | <b>198</b> | <b>141</b> | <b>164</b> |

### Preparation and pilot test

The first author and a research assistant (L Bilenberg Pedersen) translated the psychometric scales in English language: PGS, TTBQ, and PCL from English to Danish and the last author back translated to English after which consensus was reached based on the original and back translated versions of the scales. The survey was tested for comprehensibility by seven health care professionals with experience in the field of bereavement, and 18 parents, mostly mothers, with previous loss of a small child, and the final survey was adjusted according to their evaluation and comments.

### Data analyses plan

By January 1, 2018 we had received 300 completed first questionnaires. We estimate that 800 parents in Denmark every year will experience a loss during pregnancy from GA week 14 and till four weeks after birth. With the data collection now on-going in all of Denmark, we expect to include 400 mothers and 240 partners every year, with an estimated response rate of 50% among

1  
2  
3  
4 mothers and 30% among partners. We anticipate to have included approximately 5,000 mothers  
5  
6 and partners by January 2024, comprising the largest cohort in this field to date.  
7

8                   We expect to enroll the first PhD student in September 2018 in a study focusing on  
9  
10 attachment style and continuing bonds. Data will be assessed using STATA version 15.0 (StatCorp,  
11  
12 Texas, USA).  
13  
14

## 15 16 17 **Ethics and dissemination** 18

19  
20 The project will be performed according to the recommendations for good scientific practice  
21  
22 (UVVU, 2009). The Danish National Data Protection Agency has approved the project (permit  
23  
24 number 2008-58-0035, October 7, 2014) with a data collection till 2024. Bereaved parents are in a  
25  
26 particular vulnerable situation and inviting them to partake in research requires specific ethical  
27  
28 considerations. However, studies show that bereaved parents find partaking in research projects  
29  
30 to be an encouraging experience (Dyregrov, 2004), motivated by an aspiration to help other  
31  
32 parents (Breeze, Statham, Hackett, Jessop, & Lees, 2011; Dyregrov, 2004). Participation was  
33  
34 voluntary, anonymous and confidential. No incentives or compensation were offered. The parents  
35  
36 gave their consent by ticking a box stating confirmation to participate in the study and afterwards  
37  
38 access to the questionnaire itself was given.  
39  
40  
41  
42  
43  
44

## 45 **Author contributions** 46

47 Study conception and design: Hvidtjørn, Prinds, Brink Henriksen, Cacciatore and O'Connor

48  
49 Acquisition of data: Hvidtjørn, O'Connor

50  
51  
52 Analysis and interpretation of data: Hvidtjørn, Prinds, Bliddal, Brink Henriksen, Cacciatore and  
53  
54 O'Connor  
55  
56  
57  
58  
59  
60

Drafting of manuscript and critical revision: Hvidtjørn, Prinds, Bliddal, Brink Henriksen, Cacciatore and O'Connor

## Funding statement

The study was funded by Aase and Ejnar Danielsen's Fund.

## Competing interests statement

No competing interests.

## References

- Badenhorst, W., & Hughes, P. (2007). Psychological aspects of perinatal loss. *Best practice & research. Clinical obstetrics & gynaecology*, 21(2), 249-259. doi:10.1016/j.bpobgyn.2006.11.004
- Blackmore, E. R., Cote-Arsenault, D., Tang, W., Glover, V., Evans, J., Golding, J., & O'Connor, T. G. (2011). Previous prenatal loss as a predictor of perinatal depression and anxiety. *The British journal of psychiatry : the journal of mental science*, 198(5), 373-378. doi:10.1192/bjp.bp.110.083105
- Blevins, C. A., Weathers, F. W., Davis, M. T., Witte, T. K., & Domino, J. L. (2015). The Posttraumatic Stress Disorder Checklist for DSM-5 (PCL-5): Development and Initial Psychometric Evaluation. *J Trauma Stress*, 28(6), 489-498. doi:10.1002/jts.22059
- Bowlby, J. (1997). *Attachment (Attachment & Loss) - Volume One of the Attachment and Loss Trilogy (v.1: Attachment Attachment)*: Vintage.
- Breeze, A. C., Statham, H., Hackett, G. A., Jessop, F. A., & Lees, C. C. (2011). Attitudes to perinatal postmortem: parental views about research participation. *Journal of medical ethics*, 37(6), 364-367. doi:10.1136/jme.2010.038505
- Burden, C., Bradley, S., Storey, C., Ellis, A., Heazell, A. E., Downe, S., . . . Siassakos, D. (2016). From grief, guilt pain and stigma to hope and pride - a systematic review and meta-analysis of mixed-method research of the psychosocial impact of stillbirth. *BMC Pregnancy Childbirth*, 16, 9. doi:10.1186/s12884-016-0800-8
- Cacciatore, J. (2013). Psychological effects of stillbirth. *Semin Fetal Neonatal Med*, 18(2), 76-82. doi:10.1016/j.siny.2012.09.001
- Cacciatore, J., & Bushfield, S. (2007). Stillbirth: the mother's experience and implications for improving care. *J Soc Work End Life Palliat Care*, 3(3), 59-79. doi:10.1300/J457v03n03\_06
- Cacciatore, J., & Ruby, C. (2015). Medicalizing Grief: A Response to Cheng and Shen. *Prim Care Companion CNS Disord*, 17(6). doi:10.4088/PCC.15lr01913

- 1  
2  
3  
4 Calderon-Margalit, R., Friedlander, Y., Yanetz, R., Deutsch, L., Manor, O., Harlap, S., & Paltiel, O.  
5 (2007). Late stillbirths and long-term mortality of mothers. *Obstetrics and gynecology*,  
6 *109*(6), 1301-1308. doi:10.1097/01.AOG.0000264548.10767.ea
- 7 Caserta, M. S., & Lund, D. A. (2007). Toward the development of an inventory of daily widowed  
8 life (IDWL): guided by the dual process model of coping with bereavement. *Death Stud*,  
9 *31*(6), 505-535. doi:10.1080/07481180701356761
- 10 Daugirdaite, V., van den Akker, O., & Purewal, S. (2015). Posttraumatic stress and  
11 posttraumatic stress disorder after termination of pregnancy and reproductive loss: a  
12 systematic review. *J Pregnancy*, *2015*, 646345. doi:10.1155/2015/646345
- 13 DeBackere, K. J., Hill, P. D., & Kavanaugh, K. L. (2008). The parental experience of pregnancy  
14 after perinatal loss. *Journal of obstetric, gynecologic, and neonatal nursing : JOGNN /*  
15 *NAACOG*, *37*(5), 525-537. doi:10.1111/j.1552-6909.2008.00275.x
- 16 Duncan, C., & Cacciatore, J. (2015). A Systematic Review of the Peer-Reviewed Literature on  
17 Self-Blame, Guilt, and Shame. *Omega (Westport)*, *71*(4), 312-342.  
18 doi:10.1177/0030222815572604
- 19 Dyregrov, K. (2004). Bereaved parents' experience of research participation. *Social Science*  
20 *and Medicine*, *58*, 391-400.
- 21 Flint, J. C. M. (2011). Mediating Grief: Postmortem Ritualization After Child Death. *Journal of*  
22 *Loss and Trauma*, *17*(2), 158-172.
- 23 Fraley, R. C., Heffernan, M. E., Vicary, A. M., & Brumbaugh, C. C. (2011). The Experiences in  
24 Close Relationships-Relationship Structures questionnaire: a method for assessing  
25 attachment orientations across relationships. *Psychol Assess*, *23*(3), 615-625.  
26 doi:10.1037/a0022898
- 27 Gold, K. J., Leon, I., Boggs, M. E., & Sen, A. (2016). Depression and Posttraumatic Stress  
28 Symptoms After Perinatal Loss in a Population-Based Sample. *J Womens Health*  
29 *(Larchmt)*, *25*(3), 263-269. doi:10.1089/jwh.2015.5284
- 30 Guldin, M. (2014). *Tab og Sorg - en grundbog for professionelle* (Vol. 1): Hans Reitzels Forlag.
- 31 Harris, P. A., Taylor, R., Thielke, R., Payne, J., Gonzalez, N., & Conde, J. G. (2009). Research  
32 electronic data capture (REDCap)--a metadata-driven methodology and workflow  
33 process for providing translational research informatics support. *J Biomed Inform*,  
34 *42*(2), 377-381. doi:10.1016/j.jbi.2008.08.010
- 35 Hendrickson, K. C. (2009). Morbidity, mortality, and parental grief: a review of the literature  
36 on the relationship between the death of a child and the subsequent health of parents.  
37 *Palliative & supportive care*, *7*(1), 109-119. doi:10.1017/S1478951509000133
- 38 Hvidt, N. C., Hvidtjorn, D., Christensen, K., Nielsen, J. B., & Sondergaard, J. (2017). Faith Moves  
39 Mountains-Mountains Move Faith: Two Opposite Epidemiological Forces in Research  
40 on Religion and Health. *J Relig Health*, *56*(1), 294-304. doi:10.1007/s10943-016-0300-  
41 1
- 42 Hvidtjorn, D., Wu, C., Schendel, D., Thorlund Parner, E., & Brink Henriksen, T. (2015). Mortality  
43 in mothers after perinatal loss: a population-based follow-up study. *BJOG*.  
44 doi:10.1111/1471-0528.13268
- 45 Janoff-Bulman, R. (1992). *Shattered Assumptions*. New York: The Free Pres.
- 46 Jaaniste, T., Coombs, S., Donnelly, T. J., Kelk, N., & Beston, D. (2017). Risk and Resilience  
47 Factors Related to Parental Bereavement Following the Death of a Child with a Life-  
48 Limiting Condition. *Children (Basel)*, *4*(11). doi:10.3390/children4110096
- 49  
50  
51  
52  
53  
54  
55  
56  
57  
58  
59  
60

- 1  
2  
3  
4 Klass, D. (1997). The deceased child in the psychic and social worlds of bereaved parents  
5 during the resolution of grief. *Death Stud*, 21(2), 147-175.  
6 doi:10.1080/074811897202056
- 7 Kofod, E. H. (2017). Grief as a normative phenomenon. *Culture and psychology*, 0(0), 1-15.  
8 doi:10.1177/1354067X17692294
- 9 Korenromp, M. J., Page-Christiaens, G. C., van den Bout, J., Mulder, E. J., Hunfeld, J. A., Potters, C.  
10 M., . . . Visser, G. H. (2007). A prospective study on parental coping 4 months after  
11 termination of pregnancy for fetal anomalies. *Prenatal diagnosis*, 27(8), 709-716.  
12 doi:10.1002/pd.1763
- 13 Krosch, D. J., & Shakespeare-Finch, J. (2017). Grief, traumatic stress, and posttraumatic growth  
14 in women who have experienced pregnancy loss. *Psychol Trauma*, 9(4), 425-433.  
15 doi:10.1037/tra0000183
- 16 Lacasse, J. R., & Cacciatore, J. (2014). Prescribing of psychiatric medication to bereaved  
17 parents following perinatal/neonatal death: an observational study. *Death Stud*, 38(6-  
18 10), 589-596. doi:10.1080/07481187.2013.820229
- 19 Litz, A. H. J. a. B. T. (2014). Prolonged Grief Disorder: Diagnostic, Assessment, and Treatment  
20 Considerations  
21 . *Professional Psychology: Research and Practice*, 45(3), 180-187.
- 22 Lundorff, M., Holmgren, H., Zachariae, R., Farver-Vestergaard, I., & O'Connor, M. (2017).  
23 Prevalence of prolonged grief disorder in adult bereavement: A systematic review and  
24 meta-analysis. *J Affect Disord*, 212, 138-149. doi:10.1016/j.jad.2017.01.030
- 25 Maccallum, F., Malgaroli, M., & Bonanno, G. A. (2017). Networks of loss: Relationships among  
26 symptoms of prolonged grief following spousal and parental loss. *J Abnorm Psychol*,  
27 126(5), 652-662. doi:10.1037/abn0000287
- 28 Maciejewski, P. K., Maercker, A., Boelen, P. A., & Prigerson, H. G. (2016). "Prolonged grief  
29 disorder" and "persistent complex bereavement disorder", but not "complicated grief",  
30 are one and the same diagnostic entity: an analysis of data from the Yale Bereavement  
31 Study. *World Psychiatry*, 15(3), 266-275. doi:10.1002/wps.20348
- 32 Maguire, M., Light, A., Kuppermann, M., Dalton, V. K., Steinauer, J. E., & Kerns, J. L. (2015). Grief  
33 after second-trimester termination for fetal anomaly: a qualitative study.  
34 *Contraception*, 91(3), 234-239. doi:10.1016/j.contraception.2014.11.015
- 35 Meert, K. L., Thurston, C. S., & Briller, S. H. (2005). The spiritual needs of parents at the time of  
36 their child's death in the pediatric intensive care unit and during bereavement: a  
37 qualitative study. *Pediatric critical care medicine : a journal of the Society of Critical  
38 Care Medicine and the World Federation of Pediatric Intensive and Critical Care Societies*,  
39 6(4), 420-427. doi:10.1097/01.PCC.0000163679.87749.CA
- 40 Michon, B., Balkou, S., Hivon, R., & Cyr, C. (2003a). Death of a child: Parental perception of grief  
41 intensity - End-of-life and bereavement care. *Paediatrics & child health*, 8(6), 363-366.
- 42 Michon, B., Balkou, S., Hivon, R., & Cyr, C. (2003b). Death of a child: Parental perception of  
43 grief intensity - End-of-life and bereavement care. *Paediatr Child Health*, 8(6), 363-366.
- 44 Møller, R. N. M. (2015). Foetus Mortuus.
- 45 Oginska-Bulik, N., & Kobylarczyk, M. (2017). The Experience of Trauma Resulting From the  
46 Loss of a Child and Posttraumatic Growth-The Mediating Role of Coping Strategies  
47 (Loss of a Child, PTG, and Coping). *Omega (Westport)*, 30222817724699.  
48 doi:10.1177/0030222817724699
- 49 Politikken. (2016). Snart bliver sorg en diagnose.  
50  
51  
52  
53  
54  
55  
56  
57  
58  
59  
60

- 1  
2  
3  
4 Prigerson, H. G., Horowitz, M. J., Jacobs, S. C., Parkes, C. M., Aslan, M., Goodkin, K., . . .  
5 Maciejewski, P. K. (2009). Prolonged grief disorder: Psychometric validation of criteria  
6 proposed for DSM-V and ICD-11. *PLoS Med*, 6(8), e1000121.  
7 doi:10.1371/journal.pmed.1000121
- 8 Prinds, C., Hvidtjorn, D., Mogensen, O., Skytthe, A., & Hvidt, N. C. (2014). Existential meaning  
9 among first-time full-term and preterm mothers: a questionnaire study. *J Perinat*  
10 *Neonatal Nurs*, 28(4), 271-279. doi:10.1097/JPN.0000000000000060
- 11 Prinds, C., Hvidtjorn, D., Skytthe, A., Mogensen, O., & Hvidt, N. C. (2016). Prayer and meditation  
12 among Danish first time mothers-a questionnaire study. *BMC Pregnancy Childbirth*, 16,  
13 8. doi:10.1186/s12884-016-0802-6
- 14 Ritsher, J. B., & Neugebauer, R. (2002). Perinatal Bereavement Grief Scale: distinguishing grief  
15 from depression following miscarriage. *Assessment*, 9(1), 31-40.  
16 doi:10.1177/1073191102009001005
- 17 Root, B. L., & Exline, J. J. (2014). The role of continuing bonds in coping with grief: overview  
18 and future directions. *Death Stud*, 38(1-5), 1-8. doi:10.1080/07481187.2012.712608
- 19 Rubin, S. S., Nadav, O. B., Malkinson, R., Koren, D., Goffer-Shnarch, M., & Michaeli, E. (2009).  
20 The two-track model of bereavement questionnaire (TTBQ): development and  
21 validation of a relational measure. *Death Stud*, 33(4), 305-333.  
22 doi:10.1080/07481180802705668
- 23 Song, J., Floyd, F. J., Seltzer, M. M., Greenberg, J. S., & Hong, J. (2010). Long-term Effects of Child  
24 Death on Parents' Health Related Quality of Life: A Dyadic Analysis. *Family relations*,  
25 59(3), 269-282. doi:10.1111/j.1741-3729.2010.00601.x
- 26 Steinberg, J. R. (2011). Later abortions and mental health: psychological experiences of  
27 women having later abortions--a critical review of research. *Women's health issues :*  
28 *official publication of the Jacobs Institute of Women's Health*, 21(3 Suppl), S44-48.  
29 doi:10.1016/j.whi.2011.02.002
- 30 Stroebe, M., & Schut, H. (1999). The dual process model of coping with bereavement: rationale  
31 and description. *Death Stud*, 23(3), 197-224. doi:10.1080/074811899201046
- 32 Stroebe, M., & Schut, H. (2005). To continue or relinquish bonds: a review of consequences for  
33 the bereaved. *Death Stud*, 29(6), 477-494. doi:10.1080/07481180590962659
- 34 Stroebe, M., Schut, H., & Stroebe, W. (2007). Health outcomes of bereavement. *Lancet*,  
35 370(9603), 1960-1973. doi:10.1016/S0140-6736(07)61816-9
- 36 Survey, W. V. (2006). World Values Survey.
- 37 Thieleman, K., & Cacciatore, J. (2013). The DSM-5 and the bereavement exclusion: a call for  
38 critical evaluation. *Soc Work*, 58(3), 277-280.
- 39 Toedter, L. J., Lasker, J. N., & Alhadeff, J. M. (1988). The Perinatal Grief Scale: development and  
40 initial validation. *Am J Orthopsychiatry*, 58(3), 435-449.
- 41 Toedter, L. J., Lasker, J. N., & Janssen, H. J. (2001). International comparison of studies using  
42 the perinatal grief scale: a decade of research on pregnancy loss. *Death Stud*, 25(3),  
43 205-228. doi:10.1080/07481180125971
- 44 Umphrey, L. R., & Cacciatore, J. (2011). Coping with the ultimate deprivation: narrative themes  
45 in a parental bereavement support group. *Omega*, 63(2), 141-160.
- 46 UVVU, U. V. V. U. (2009). Vejledninger i God Videnskabelig Praksis med særlig fokus på  
47 sundhedsvidenskab, naturvidenskab og teknisk videnskab.  
48 6B72 Prolonged grief disorder, (2016).
- 49  
50  
51  
52  
53  
54  
55  
56  
57  
58  
59  
60

- 1  
2  
3  
4 Wijngaards-de Meij, L., Stroebe, M., Schut, H., Stroebe, W., van den Bout, J., van der Heijden, P.  
5 G., & Dijkstra, I. (2007). Patterns of attachment and parents' adjustment to the death of  
6 their child. *Pers Soc Psychol Bull*, 33(4), 537-548. doi:10.1177/0146167206297400  
7 Wonch Hill, P., Cacciatore, J., Shreffler, K. M., & Pritchard, K. M. (2017). The loss of self: The  
8 effect of miscarriage, stillbirth, and child death on maternal self-esteem. *Death Stud*,  
9 41(4), 226-235. doi:10.1080/07481187.2016.1261204  
10  
11  
12  
13  
14  
15  
16  
17  
18  
19  
20  
21  
22  
23  
24  
25  
26  
27  
28  
29  
30  
31  
32  
33  
34  
35  
36  
37  
38  
39  
40  
41  
42  
43  
44  
45  
46  
47  
48  
49  
50  
51  
52  
53  
54  
55  
56  
57  
58  
59  
60

# BMJ Open

**Life after loss**  
**Protocol for a Danish longitudinal follow-up study unfolding**  
**life and grief after the death of a child during pregnancy**  
**from gestational week 14, during birth or in the first 4**  
**weeks of life**

|                                 |                                                                                                                                                                                                                                                                                                                                                                             |
|---------------------------------|-----------------------------------------------------------------------------------------------------------------------------------------------------------------------------------------------------------------------------------------------------------------------------------------------------------------------------------------------------------------------------|
| Journal:                        | <i>BMJ Open</i>                                                                                                                                                                                                                                                                                                                                                             |
| Manuscript ID                   | bmjopen-2018-024278.R1                                                                                                                                                                                                                                                                                                                                                      |
| Article Type:                   | Protocol                                                                                                                                                                                                                                                                                                                                                                    |
| Date Submitted by the Author:   | 30-Aug-2018                                                                                                                                                                                                                                                                                                                                                                 |
| Complete List of Authors:       | Hvidtjørn, Dorte; Syddansk Universitet Det Sundhedsvidenskabelige Fakultet,<br>Prinds, Christina; Syddansk Universitet Det Sundhedsvidenskabelige Fakultet<br>Bliddal, Mette; University of Southern Denmark, Obstetrics and Gynaecology<br>Henriksen, Tine; Aarhus Universitet Health<br>Cacciatore, Joanne; Arizona State University<br>O'Connor, Maja; Aarhus University |
| <b>Primary Subject Heading</b>: | Evidence based practice                                                                                                                                                                                                                                                                                                                                                     |
| Secondary Subject Heading:      | Obstetrics and gynaecology, Health services research, Mental health, Patient-centred medicine                                                                                                                                                                                                                                                                               |
| Keywords:                       | Perinatal Death, Grief, Cohort Study, Life Change Events, Quality of health care                                                                                                                                                                                                                                                                                            |
|                                 |                                                                                                                                                                                                                                                                                                                                                                             |

SCHOLARONE™  
Manuscripts

## Life after loss

### Protocol for a Danish longitudinal follow-up study unfolding life and grief after the death of a child during pregnancy from gestational week 14, during birth or in the first 4 weeks of life

Dorte Hvidtjørn [dhvidtjoern@health.sdu.dk](mailto:dhvidtjoern@health.sdu.dk),<sup>1,2</sup> Christina Prinds [cprinds@health.sdu.dk](mailto:cprinds@health.sdu.dk),<sup>1,3</sup> Mette Bliddal

[mette.bliddal@rsyd.dk](mailto:mette.bliddal@rsyd.dk),<sup>4</sup> Tine Brink Henriksen [tine.brink.henriksen@clin.au.dk](mailto:tine.brink.henriksen@clin.au.dk),<sup>5,6</sup> Joanne Cacciatore

[icaccia@me.com](mailto:icaccia@me.com),<sup>7</sup> Maja O'Connor [maja@psy.au.dk](mailto:maja@psy.au.dk)<sup>8</sup>

1) Research Unit for Gynecology and Obstetrics, Institute of Clinical Research, University of Southern Denmark and Odense University Hospital, Odense, Denmark, 2) Unit for Perinatal Loss, Department of Gynecology and Obstetrics, Aarhus University Hospital, Aarhus, Denmark, 3) Midwifery College, University College South Denmark, Esbjerg, Denmark, 4) OPEN Odense Patient Data Explorative network, University of Southern Denmark and Odense University Hospital, Odense, Denmark, 5) Perinatal Epidemiology Research Unit, Aarhus University Hospital, Aarhus, Denmark, 6) Department of Pediatrics, Aarhus University Hospital, Aarhus, Denmark, 7) School of Social Work, Arizona State University, Arizona, USA, 8) Department of Psychology and Behavioral Sciences, Aarhus University, Aarhus, Denmark

Keywords: Perinatal Death, Grief, Cohort Study, Life Change Events, Quality of Health Care

Corresponding author: Dorte Hvidtjørn [dhvidtjoern@health.sdu.dk](mailto:dhvidtjoern@health.sdu.dk)

Word count:

## Abstract

**Introduction:** After the death of a child during pregnancy, birth or in the neonatal period, parents often experience feelings of guilt, disenfranchisement, feelings of betrayal by one's own body and envy of others. Such bereavement results in high rates of distress: psychologically, emotionally, physiologically and existentially. These data are collected using a national, longitudinal cohort to assess grief in mothers and their partners after the death of a child during pregnancy, birth, or in the neonatal period. Our aim is to achieve a general description of grief, emotional health, and existential values after pregnancy or perinatal death in a Danish population.

1  
2  
3  
4 **Methods and analysis:** The cohort comprises mothers and their partners in Denmark who lose a  
5  
6 child during pregnancy from gestational week 14, during birth or in the neonatal period (4 weeks  
7  
8 post partum). We began data collection in 2015 and plan to continue until 2024. The aim is to  
9  
10 include 5,000 participants by 2024, generating the largest cohort in the field to date. Parents are  
11  
12 invited to participate at the time of hospital discharge or via the Patient Associations homepage.  
13  
14 Socio-demographic and obstetric variables are collected. Validated psychometric measures  
15  
16 covering attachment, continuing bonds, posttraumatic stress, prolonged grief, perinatal grief and  
17  
18 existential values were chosen to reach our aim.  
19  
20

21  
22 **Ethics and dissemination:** Data are collected using web-based questionnaires distributed at 1-2, 7  
23  
24 and 13 months after the loss. The study was approved by The Danish National Data Protection  
25  
26 Agency (No. 18/15684, October 7, 2014). The results will be disseminated in peer-review and  
27  
28 professional journals as well as in layman magazines, lectures and radio broadcasts.  
29  
30

### 31 32 33 34 35 **Strengths and limitations**

- 36  
37 • A comprehensive population based longitudinal study targeting at 5,000 participants by  
38  
39 2024 (by January 2018, 300 completed questionnaires and ongoing), and expected to  
40  
41 become the largest cohort in this field.  
42  
43
- 44  
45 • Using multiple validated, self-administered questionnaires enabling studies within  
46  
47 attachment, continuing bonds, posttraumatic stress, prolonged grief, perinatal grief,  
48  
49 existential values and the quality of health services.  
50
- 51  
52 • Multi-professional approach including psychologist, midwives, perinatal epidemiologists  
53  
54 and anthropologists ensuring a resourceful approach.  
55  
56  
57  
58  
59

- A robust response rate around 50%, however with 75% of the participants being mothers. Potential participants receive written and verbal reminders to improve the response rate and information addressing the importance of the fathers' participation specifically has been added.
- Non-responders can be described partly, but information on educational level and employment is not available for non-responders. A selection analysis will be performed using the available variables (e.g. age, parity, gestational age at birth and type of loss) and also comparing participants to the background population.
- Recruitment differs between the five regions of Denmark, as all potential participants are invited in two of the regions and in the remaining three regions participants are only invited via homepages, Facebook and patient organizations. Most likely, this will lead to an uneven participation rate and selection between regions; however, it will allow us to assess the efficiency of the various recruitment types.

## Introduction

When we lose a person we love, we grieve. Grief is a simultaneously universal phenomenon and yet an entirely individual experience. Grief is also a cultural phenomenon, influenced by alternating normativity and beliefs over time.[1] In contemporary Western countries, grief and suffering are increasingly embedded in medical and psychiatric paradigms.[2, 3] For example, the World Health Organization is preparing criteria for a new diagnosis termed Prolonged Grief Disorder (PGD), anticipated to be introduced in the diagnostic manuals for mental disorders in 2018.[4] Discussions about how to define pathological grief are actualized both in professional settings and the broader population.[5-8] There is general agreement that the majority of

1  
2  
3  
4 bereaved individuals eventually, and without professional interventions, will arrive at a new  
5  
6 emotional equilibrium after loss. According to Litz et al only a minority will experience PGD,  
7  
8 suffering significant impairment in important areas of daily life to a disabling degree more than six  
9  
10 months after loss.[9] A recent meta-analysis found a prevalence of PGD in approximately 10% in  
11  
12 bereaved adults, however only a small fraction of the bereaved in these 14 studies included  
13  
14 bereaved parents.[10]  
15

16  
17  
18 Thus, it is not clear how well these findings apply to the grieving process among  
19  
20 parents after the death of a baby. Their grieving process might differ from grief processes in  
21  
22 general, and a larger proportion may experience the symptoms of PGD. Put differently, a longer  
23  
24 period of intense grief may be the normal response for parents grieving after the death of a baby.  
25  
26 This hypothesis forms the basis of this longitudinal, follow-up study where we aim to assess grief  
27  
28 among mothers and partners after the loss of a child during pregnancy from gestational week 14,  
29  
30 during birth or in the neonatal period (4 weeks post partum). We include miscarriages,  
31  
32 termination of pregnancy due to fetal anomaly (TOPFA), and the death of babies due to stillbirths  
33  
34 and neonatal deaths.  
35  
36  
37  
38

### 39 **The nature of perinatal grief**

40  
41 The death of a baby can be a life-changing and devastating experience.[11] A growing body of  
42  
43 literature has assessed the nature of grief among parents who lose a child during pregnancy, birth,  
44  
45 or in the neonatal period. One meta-analysis analyzing 144 studies about parental grief  
46  
47 demonstrates that the majority of studies originate in North America, followed by Great Britain,  
48  
49 Sweden and Australia.[12] Findings conclude that loss from miscarriage, stillbirth, TOPFA or  
50  
51 neonatal death often involves feelings of guilt, disenfranchisement, feelings of betrayal by ones  
52  
53 body and envy of others.[12, 13] Parents lose the prospect of an entire life with the child and all  
54  
55  
56  
57  
58  
59  
60

1  
2  
3  
4 the moments they dreamt of sharing.[14] Furthermore, bereaved parents of young babies who die  
5  
6 have few mementoes of the child, none or few pictures and a very short narrative.[15] The loss  
7  
8 has been called “invisible” and especially if the child died before or during birth family and friends  
9  
10 might not regard the child as real. They may also be reluctant to talk about the dead child, leading  
11  
12 to emotional isolation complicating the grief process.[12, 16, 17] Some parents, mostly mothers,  
13  
14 describe a loss of self-esteem.[14, 16, 18, 19] For the mother, the bodily unity with the dead child  
15  
16 might be still another stressful element.[20] For parents choosing TOPFA feelings of guilt and  
17  
18 doubt can further thwart the grief process.[21, 22]  
19  
20  
21  
22

### 23 **Outcomes of pregnancy and perinatal bereavement**

24  
25 The outcomes of pregnancy and perinatal bereavement are also assessed in international studies,  
26  
27 finding high rates of psychological and emotional distress and diagnoses including; major  
28  
29 depressive disorder, general anxiety disorder, post traumatic stress disorder (PTSD), sense of  
30  
31 failure, long-term guilt and intense grief for more than 2 years.[12, 20, 23, 24]  
32  
33

34  
35 Generally, measured by similar instruments mothers appear to be more afflicted  
36  
37 than fathers.[23, 25, 26] A review of 11 studies assessed the association between type of loss and  
38  
39 mental health and found lower or comparable levels of depression, anxiety and PTSD among  
40  
41 mothers losing a child from TOPFA and mothers losing a child from stillbirth.[27] The risk for PTSD  
42  
43 was assessed in a systematic review of 48 studies. They found an increasing risk of PTSD related to  
44  
45 higher gestational age at time of loss and certain socio-demographic and psychosocial  
46  
47 characteristics predicting PTSD.[28] Unsurprisingly, the PTSD risk appears to be 7 times higher in  
48  
49 mothers after a perinatal death compared to mothers with a live birth.[29] A review of 18 studies  
50  
51 on self-blame, guilt, and shame among bereaved parents (including stillbirths and the loss of older  
52  
53 children) showed a high prevalence of all three states and an association with grief intensity.[30]  
54  
55  
56  
57  
58  
59  
60

1  
2  
3  
4 Higher mortality rates from natural causes among mothers who experienced a perinatal death  
5  
6 were found in two large population based studies established on register data.[31, 32]  
7

8 Explorations of subsequent pregnancy following the loss suggest that some mothers  
9  
10 are at an increased risk of depression and anxiety.[33, 34] Patient-centered compassionate care is  
11  
12 valued by the parents,[20] but we identified no studies assessing the long term effect of the type  
13  
14 of care provided at the hospital.  
15

16  
17 Despite the above-mentioned outcomes, some bereaved parents describe the loss as  
18  
19 a pivotal event in a broader and more life-changing sense. Grief can make an existential imprint on  
20  
21 the bereaved parents potentially leading to both posttraumatic growth as well as posttraumatic  
22  
23 stress, which is often mentioned in the literature.[11, 35-37]  
24  
25  
26  
27  
28  
29

### 30 **The theoretical framework**

31  
32 In this section we explicate the theoretical framework, which piloted the preparation of the  
33  
34 questionnaires and the forthcoming data analyses.  
35

36  
37 In general, unexpected and traumatic loss increases the risk of impaired physical and  
38  
39 emotional health in the bereaved, and the loss of a child in the perinatal period will most often be  
40  
41 unexpected and traumatic.[25]  
42

43  
44 Attachment style is shown to be related to adaption to the loss with more intense  
45  
46 and enduring symptoms of grief and depression, complicated grief reactions, and decreased  
47  
48 resilience in parents with an insecure attachment style (on both avoidance and anxiety  
49  
50 attachment).[38, 39] Attachment theory, first introduced by John Bowlby in the 1970s, provides a  
51  
52 unique way to characterize individual differences in reactions to loss because it illuminates the  
53  
54 nature of a person's relationships and adjustment in situations of separation.[38] Different styles  
55  
56  
57  
58  
59

1  
2  
3  
4 of attachment, developed through the early parent-child relationship, will form the basis for  
5  
6 responses to emotionally distressing situations such as bereavement.[40]  
7

8           The Dual Process Model (DPM) has become a widespread model in understanding  
9  
10 grief in contemporary Western countries.[41] The DPM emphasizes two concurrent types of  
11  
12 stressors and coping processes: loss-oriented and restoration-oriented. It underscores that  
13  
14 bereaved individuals often oscillate between these two processes throughout the course of  
15  
16 bereavement, and a standstill in one of the two processes might be associated with prolonged  
17  
18 grief.[41]  
19  
20

21  
22           In Freud's classic grief work theory, detachment from the person who died is  
23  
24 emphasized as fundamental for adaption to the loss and this idea has influenced the attitude of  
25  
26 society and bereaved individuals for nearly 100 years. This philosophy is now challenged by the  
27  
28 continuing bonds theory.[42] Continuing bonds has been defined as "*the presence of an on-going*  
29  
30 *inner relationship with the deceased person by the bereaved individual*" representing diverse  
31  
32 behaviors.[43] The literature reveals contradictory findings of the role of continuing bonds in  
33  
34 bereavement, with certain types of continuing bonds associated with both adaptive and  
35  
36 maladaptive adjustment in various studies. Moreover, outcomes are influenced by the social and  
37  
38 cultural acceptance of grieving individuals and their continued relationship with the deceased.[44]  
39  
40  
41

42  
43           When a child dies at birth the natural order of life is disturbed and assumptive  
44  
45 worldviews shatter, challenging three primary core beliefs relating to benevolence,  
46  
47 meaningfulness of the world and worthiness of the self, and requiring a reorganization of  
48  
49 worldviews.[11, 45] This disruption of core belief might lead to changes in philosophy of life or  
50  
51 spiritual beliefs.[11] These changes may be perceived as helpful or unhelpful, as the literature  
52  
53 shows incongruent findings in how religiosity and spirituality relate to bereavement outcomes.[39]  
54  
55  
56  
57  
58  
59

### The Danish setting

There are huge dissimilarities between the health care systems in Denmark and North America from where most of the studies originate. Danish health care is publicly available and free. Furthermore, there are different approaches in the way healthcare professionals support bereaved parents in creating a relationship with their dead child and acknowledging their grief.[12, 46] Additionally, patient centered psychosocial care is a basic standard of care in Danish hospitals, while the prescription of psychiatric medication appears to be much more common in the U.S.[3, 46] Specifically, when we explore existential values and spiritual beliefs, findings from more religious countries, such as the U.S., have poor external validity when compared to a secularized country such as Denmark.[47-49] Hence, studies in a Danish context can expand our knowledge on grief after perinatal death.

### Aim

In this longitudinal national follow-up study, we aim to assess grief symptoms among mothers and partners after the loss of a child during pregnancy, birth, or in the neonatal period. We aim to achieve a general description of grief, emotional health, and existential values after pregnancy or neonatal loss in a Danish population.

To achieve our objectives, we based the study on the following overall research questions:

1. How does the process of grief change for bereaved parents in the first 13 months after the loss?
2. What, if any, gender differences exist in the grief process?
3. How is attachment style associated with continuing bonds and grief?
4. Does gestational age at the time of death influence grief?

1  
2  
3  
4 5. Does the loss change existential or spiritual values or practices?  
5  
6  
7

## 8 **Methods and analysis**

9

10 This nationwide population based cohort study comprises mothers and partners who lost a child  
11 during pregnancy after gestational week 14, during or after birth or in the neonatal period. We  
12 include miscarriage, TOPFA, stillbirth and neonatal death. In Denmark, a regional counsel can  
13 grant permission to perform TOPFA until GA week 22; stillbirth is defined as intrauterine fetal  
14 death from GA week 22. We use web-based questionnaires distributed at three specific time  
15 points in the first 13 months after the loss. Study data were collected and managed using REDCap  
16 electronic data capture tools hosted at University of Southern Denmark.[50] Mothers and their  
17 partners are asked to reply to the questionnaires individually.  
18  
19  
20  
21  
22  
23  
24  
25  
26  
27

28  
29 Data collection started in the Region of Southern Denmark in January 2016 and in the  
30 Region of Central Jutland in January 2017. In the summer of 2018 we expanded the study  
31 nationally and included the remaining three regions in Denmark. Data collection was permitted by  
32 The Danish Data Protection Agency until January 2025.  
33  
34  
35  
36  
37

38 In the Regions of Southern Denmark and Central Jutland, parents receive short  
39 written and verbal information from healthcare professionals about the study before leaving  
40 hospital. Subsequently they receive the first e-mail from the project manager 4 to 8 weeks after  
41 the loss with comprehensive information about the study and a link to the questionnaire. In the  
42 rest of Denmark, parents are invited to participate through announcements on the homepage for  
43 the national patient organization "Landsforeningen Spædbarnsdød". This agency offers free  
44 counseling to perinatally bereaved families. Via a link at the homepage, parents sign up with an e-  
45  
46  
47  
48  
49  
50  
51  
52  
53  
54  
55  
56  
57  
58  
59  
60

1  
2  
3  
4 mail address and receive comprehensive information and a questionnaire. Access to the study  
5  
6 questionnaire is given only when the parents have consented to participation.  
7

8  
9 The questionnaire is sent to parents at three time points: 4 to 8 weeks, 7, and 13  
10 months after the loss. If not returned, each questionnaire is followed by reminders, the first one  
11 after 3 weeks and the second one after 6 weeks. Due to an initial low response rate, we further  
12 introduced a verbal reminder in January 2018 via a telephone call made by a research assistant  
13 with experience in grief counseling. In the Region of Southern Denmark, basic information (age,  
14 date of birth, date of death, gestational age at birth, parity and type of loss) on all potential  
15 participants are registered, allowing us to conduct a dropout analysis.  
16  
17  
18  
19  
20  
21  
22  
23  
24

### 25 **The questionnaires**

26  
27 The survey was constructed with a combination of basic information in relation to socio-  
28 demographics and obstetric variables, state-of-the-art psychometrical testing by validated  
29 questionnaires and ad hoc questions specifically prepared for this study. We included seven  
30 psychometric scales addressing the different aspects of our research questions (Table 1).  
31  
32  
33  
34  
35  
36

### 37 **Socio-demographic variables**

38  
39 We included the following socio-demographic variables: age, sex of partner (to identify female  
40 partners), marital status (married, co-habiting, single), educational level (basic school (9–10 years  
41 of education), intermediate length education (11–16 years of education) and university education  
42 (17 or more years of education), present occupation and occupation before the loss (on maternity  
43 leave, on sick leave, unemployed, at work or studying).  
44  
45  
46  
47  
48  
49  
50  
51  
52  
53  
54  
55  
56  
57  
58  
59  
60

### Obstetric and organizational variables

The following obstetrical variables were included: previous perinatal loss, parity, assisted reproduction, single- or multiple pregnancies, type of loss (missed abortion, miscarriage, TOPFA, stillbirth, death after birth), mode of birth (vaginal vs. cesarean section), gestational age at the time of loss, admission to the neonatal intensive care unit (NICU), and age of child if death occurred after birth, and seeing and holding the dead child. Organizational variables were: hospital and type of department to which the couple was admitted, and experienced quality of psychosocial support (midwives, doctors, nurses, social worker, undertaker, religious person (chaplain, imam or other) and patient organization).

### Psychometric scales

To measure attachment style we included a version of "The Experience in Close Relationships Scale – revised, short form (ECR-R)" modified to bereaved samples.[51] Participants were asked to express how much they agreed or disagreed with 12 statements concerning how they feel in emotionally intimate relationships on a seven-point scale ranging from highly disagree to strongly agree. Scores for attachment related anxiety and attachment related avoidance were obtained by averaging a person's scores (0 to 6) on each of the 12 items and the composite scores for anxiety and avoidance were highly reliable (alpha score >.80) despite based on a small number of items.[51]

We used the Perinatal Grief Scale (PGS) developed in 1988 to construct a comprehensive measure of perinatal grief to facilitate comparison among findings in the field.[13, 52] The scale was constructed to address the potential disparities between nonspecific grief and perinatal grief.[13] The PGS contains 33 statements covering dimensions as e.g. guilt, loneliness, and jealousy with an option of answering on a five-point scale ranging from highly disagree to

1  
2  
3  
4 strongly agree. The PGS has good internal consistency (alpha 0.95).[53] A clinical cut-off of 91 has  
5  
6 been established for the PGS, where greater scores indicate a high level of perinatal grief.[53]  
7

8 To assess the process of bereavement within the DPM paradigm, the Inventory of  
9  
10 Daily Widowed Life (IDWL) was used.[54] The IDWL was developed studying a group of widows in  
11  
12 2007. However, items in the scale could be adaptable to other losses and relationships with some  
13  
14 modifications.[54] The inventory comprises 15 items on doings, thoughts, or feelings and the  
15  
16 participants answer how often within the last week they have been preoccupied by each task by  
17  
18 choosing one of four categories; seldom or never, sometimes, quite often and nearly all the time.  
19  
20 IDWL was developed to measure the processes of loss-orientation (LO) and restoration-  
21  
22 orientation (RO) and the oscillation between. The LO and RO subscales produced alpha  
23  
24 coefficients of .90 and .79, respectively.[54]  
25  
26  
27  
28

29 We also included the Post Traumatic Stress Disorder Checklist (PCL-PTSD).[55] The  
30  
31 PCL was developed in 1990 and comprises 17 items corresponding to the PTSD symptom criteria in  
32  
33 the Diagnostic and Statistical Manual of Mental Disorders (5th ed.).[55] Respondents indicate how  
34  
35 much they have been bothered by each PTSD symptom over the past month, using a 5-point scale  
36  
37 ranging from not at all to extremely (scores 1 to 5). PCL scores exhibited strong internal  
38  
39 consistency ( $\alpha = .94$ ), and test-retest reliability ( $r = .82$ ).[55]  
40  
41  
42

43 To address the question of continuing bonds, we included “The Two Track  
44  
45 Bereavement Questionnaire on Life Following Loss”.[56] This model aims to devote balanced  
46  
47 attention to two domains of the bereavement experience: the nature of biopsychosocial  
48  
49 functioning and the nature of the ongoing relationship to the deceased. Construct and concurrent  
50  
51 validity were examined and were found satisfactory.[56]  
52  
53  
54  
55  
56  
57  
58  
59  
60

In order to assess the likelihood of symptoms related to the diagnosis of PGD within this cohort, we incorporated Prolonged Grief Disorder-13.[57] The scale includes 13 items related to feelings, thoughts and behaviors. High scores within the specific items associated with severe functional impairment fulfill the criterion for PGD. Item response theory analyses derived the most informative, unbiased PGD symptoms, combination analyses identified the most sensitive and specific PGD algorithm and the scale was then tested finding high psychometric validity.

We also included questions from “The European Value Survey”,[58] supplemented by questions on worldviews, existential values, and spiritual beliefs developed for a study on existential meaning and motherhood.[48] The questions addressed alterations in meaning and purpose in life, religious faith, belief in afterlife, church attendance, prayer, and meditation and whether there was a need (met or unmet) for discussing these existential matters with others.

**Table 1.** Overview of domains and psychometric scales included in the three questionnaires, showing the number of questions within the specific scales at specific times.

| Scales                                                                                                  | Questionnaire 1   | Questionnaire 2 | Questionnaire 3  |
|---------------------------------------------------------------------------------------------------------|-------------------|-----------------|------------------|
| <b>Time since the loss</b>                                                                              | <b>24-60 days</b> | <b>7 months</b> | <b>13 months</b> |
| Socio-demographic and obstetric variables                                                               | 22                |                 |                  |
| The Inventory of Daily Widowed Life (IDWL) (Caserta & Lund, 2007)                                       | 15                | 15              | 15               |
| The Two Track Bereavement Questionnaire on Life Following Loss (TTBQ) (Rubin et al., 2009)              | 60                | 60              | 60               |
| The Experience in Close Relationships Scale – revised, short form (ECR-R) (Fraley, Heffernan, Vicary, & | 12                |                 |                  |

|                                                                                                       |            |            |            |
|-------------------------------------------------------------------------------------------------------|------------|------------|------------|
| Brumbaugh, 2011)                                                                                      |            |            |            |
| Selected questions from The European Value Survey (Survey, 2006)                                      | 23         |            | 23         |
| Prolonged Grief Disorder (PG-13) [57]                                                                 | 13         | 13         | 13         |
| Post Traumatic Stress Disorder Checklist (PCL-PTSD) (Blevins, Weathers, Davis, Witte, & Domino, 2015) | 17         | 17         | 17         |
| Perinatal Grief Scale (PGS), Toedter et al., 1988)                                                    | 33         | 33         | 33         |
| <b>Total number of questions</b>                                                                      | <b>195</b> | <b>138</b> | <b>161</b> |

### Preparation and pilot test

The first author and a research assistant (L Bilenberg Pedersen) translated the psychometric scales into English: PGS, TTbQ, and PCL from English to Danish and the last author back translated to English after which consensus was reached based on the original and back translated versions of the scales. The survey was tested for comprehensibility by seven health care professionals with experience in the field of bereavement, and 18 parents, mostly mothers, with a previous loss of a young child. The final survey was adjusted according to their evaluation and comments.

### Data analyses plan

By January 1, 2018 we had received 300 completed first questionnaires. We estimate that 800 parents in Denmark every year will experience a loss from GA week 14 up to four weeks after birth. With the data collection now on-going in all of Denmark, we expect to include 400 mothers and 240 partners every year, with an estimated response rate of 50% among mothers and 30%

1  
2  
3  
4 among partners. We anticipate approximately 5,000 participants by January 2024, comprising the  
5  
6 largest cohort in this field to date.  
7

8           In the region of Southern Denmark, we have the following information on non-  
9  
10 responders: mother/partner, age, date contacted, parity, gestational age at birth and age at death,  
11  
12 whether the loss was TOPFA, miscarriage, stillbirth or death post partum, and whether the  
13  
14 participant wanted to take part in a bereavement support group. We will describe the non-  
15  
16 responders/responders according to these variables.  
17  
18

19  
20           We expect to enroll the first PhD student in September 2018 in a study focusing on  
21  
22 attachment style and continuing bonds.  
23  
24

### 25 26 27 28 29 **Statistical analysis plan** 30

31           The characteristics of the cohort will be described by means and interquartile ranges  
32  
33 for continuous data and by frequencies with 95% confidence interval for categorized and  
34  
35 dichotomized data. Hypotheses will be modeled and tested using logistic regression models for  
36  
37 dichotomous outcomes and ordinal logistic regression models where the dependent variable is  
38  
39 based on ordinal data according to e.g. type of attachment, gender of the bereaved, or type of  
40  
41 loss. We will use mixed effect models to examine time trends when examining changes over time  
42  
43 in answering the same questions up to three times. All analyses will be adjusted for relevant socio-  
44  
45 demographic and medical covariates depending on the underlying hypothesis. Data will be  
46  
47 analyzed using STATA version 15.0 (StatCorp, Texas, USA).  
48  
49  
50  
51  
52  
53  
54  
55  
56  
57  
58  
59  
60

## Patient and Public Involvement

Eighteen parents who had previously lost a baby tested the questionnaire and their priorities, experience, and preferences were taken into account in the final version of the survey. The patient organization “Landsforeningen Spædbarnsdød” played a very active part in the design of the study. The study has a homepage where published papers will be presented to ensure that participants have access to the results:

[https://www.sdu.dk/da/om\\_sdu/institutter\\_centre/klinisk\\_institut/forskning/forskningsenheder/gynaekologibstetrik/forskningsprojekter/liveteft\\_ertabet](https://www.sdu.dk/da/om_sdu/institutter_centre/klinisk_institut/forskning/forskningsenheder/gynaekologibstetrik/forskningsprojekter/liveteft_ertabet)

## Ethics and dissemination

The project will be enacted according to the recommendations for good scientific practice.[59] The Danish National Data Protection Agency has approved the project (permit number 2008-58-0035, October 7, 2014) with a data collection till 2024. Bereaved parents are a particularly vulnerable population and inviting them to partake in research requires specific ethical considerations. However, studies show that bereaved parents find partaking in research projects to be a positive experience,[60] motivated by an aspiration to help other parents,[60, 61] Participation was voluntary, anonymous and confidential. No incentives or compensation were offered. Participants gave their consent by ticking a box stating confirmation to participate in the study and afterwards access to the questionnaire itself was given.

The results will be disseminated in peer-reviewed and professional papers, as well as in more public layman magazines, lectures and radio broadcasts.

## Author contributions

Study conception and design: Hvidtjørn, Prinds, Brink Henriksen, Cacciatore and O’Connor

1  
2  
3  
4 Acquisition of data: Hvidtjørn, O'Connor

5  
6 Analysis and interpretation of data: Hvidtjørn, Prinds, Bliddal, Brink Henriksen, Cacciatore and  
7  
8 O'Connor

9  
10 Drafting of manuscript and critical revision: Hvidtjørn, Prinds, Bliddal, Brink Henriksen, Cacciatore  
11  
12 and O'Connor

13  
14 We wish to thank "Landsforeningen Spædbarnsdød" and the parents who participated in the  
15  
16 design of the study and the development of the survey.  
17  
18

## 19 20 21 22 **Funding statement**

23  
24 The study was funded by Aase and Ejnar Danielsen's Fund.  
25  
26

## 27 28 29 **Competing interests statement**

30  
31 No competing interests.  
32  
33

## 34 35 36 **References**

- 37  
38 1. Kofod, E.H., *Grief as a normative phenomenon*. Culture and psychology, 2017. **0**(0): p. 1-  
39 15.
- 40 2. Cacciatore, J. and C. Ruby, *Medicalizing Grief: A Response to Cheng and Shen*. Prim Care  
41 Companion CNS Disord, 2015. **17**(6).
- 42 3. Lacasse, J.R. and J. Cacciatore, *Prescribing of psychiatric medication to bereaved parents*  
43 *following perinatal/neonatal death: an observational study*. Death Stud, 2014. **38**(6-10):  
44 p. 589-96.
- 45 4. WHO, I., *6B72 Prolonged grief disorder*. 2016.
- 46 5. Maciejewski, P.K., et al., *"Prolonged grief disorder" and "persistent complex bereavement*  
47 *disorder", but not "complicated grief", are one and the same diagnostic entity: an analysis*  
48 *of data from the Yale Bereavement Study*. World Psychiatry, 2016. **15**(3): p. 266-275.
- 49 6. Politikken, *Snart bliver sorg en diagnose*. 2016.
- 50 7. Thieleman, K. and J. Cacciatore, *The DSM-5 and the bereavement exclusion: a call for*  
51 *critical evaluation*. Soc Work, 2013. **58**(3): p. 277-80.  
52  
53  
54  
55  
56  
57  
58  
59  
60

- 1
- 2
- 3
- 4 8. Maccallum, F., M. Malgaroli, and G.A. Bonanno, *Networks of loss: Relationships among*
- 5 *symptoms of prolonged grief following spousal and parental loss.* J Abnorm Psychol,
- 6 2017. **126**(5): p. 652-662.
- 7 9. Litz, A.H.J.a.B.T., *Prolonged Grief Disorder: Diagnostic, Assessment, and Treatment*
- 8 *Considerations*
- 9 Professional Psychology: Research and Practice, 2014. **45**(3): p. 180-187.
- 10 10. Lundorff, M., et al., *Prevalence of prolonged grief disorder in adult bereavement: A*
- 11 *systematic review and meta-analysis.* J Affect Disord, 2017. **212**: p. 138-149.
- 12 11. Krosch, D.J. and J. Shakespeare-Finch, *Grief, traumatic stress, and posttraumatic growth*
- 13 *in women who have experienced pregnancy loss.* Psychol Trauma, 2017. **9**(4): p. 425-
- 14 433.
- 15 12. Burden, C., et al., *From grief, guilt pain and stigma to hope and pride - a systematic*
- 16 *review and meta-analysis of mixed-method research of the psychosocial impact of*
- 17 *stillbirth.* BMC Pregnancy Childbirth, 2016. **16**: p. 9.
- 18 13. Toedter, L.J., J.N. Lasker, and J.M. Alhadeff, *The Perinatal Grief Scale: development and*
- 19 *initial validation.* Am J Orthopsychiatry, 1988. **58**(3): p. 435-49.
- 20 14. Michon, B., et al., *Death of a child: Parental perception of grief intensity - End-of-life and*
- 21 *bereavement care.* Paediatr Child Health, 2003. **8**(6): p. 363-6.
- 22 15. Flint, J.C.M., *Mediating Grief: Postmortem Ritualization After Child Death.* Journal of Loss
- 23 and Trauma, 2011. **17**(2): p. 158-172.
- 24 16. Hendrickson, K.C., *Morbidity, mortality, and parental grief: a review of the literature on*
- 25 *the relationship between the death of a child and the subsequent health of parents.*
- 26 *Palliative & supportive care*, 2009. **7**(1): p. 109-19.
- 27 17. Umphrey, L.R. and J. Cacciatore, *Coping with the ultimate deprivation: narrative themes*
- 28 *in a parental bereavement support group.* Omega, 2011. **63**(2): p. 141-60.
- 29 18. Meert, K.L., C.S. Thurston, and S.H. Briller, *The spiritual needs of parents at the time of*
- 30 *their child's death in the pediatric intensive care unit and during bereavement: a*
- 31 *qualitative study.* Pediatric critical care medicine : a journal of the Society of Critical
- 32 Care Medicine and the World Federation of Pediatric Intensive and Critical Care
- 33 Societies, 2005. **6**(4): p. 420-7.
- 34 19. Wonch Hill, P., et al., *The loss of self: The effect of miscarriage, stillbirth, and child death*
- 35 *on maternal self-esteem.* Death Stud, 2017. **41**(4): p. 226-235.
- 36 20. Cacciatore, J., *Psychological effects of stillbirth.* Semin Fetal Neonatal Med, 2013. **18**(2):
- 37 p. 76-82.
- 38 21. Korenromp, M.J., et al., *A prospective study on parental coping 4 months after*
- 39 *termination of pregnancy for fetal anomalies.* Prenatal diagnosis, 2007. **27**(8): p. 709-
- 40 16.
- 41 22. Maguire, M., et al., *Grief after second-trimester termination for fetal anomaly: a*
- 42 *qualitative study.* Contraception, 2015. **91**(3): p. 234-9.
- 43 23. Michon, B., et al., *Death of a child: Parental perception of grief intensity - End-of-life and*
- 44 *bereavement care.* Paediatrics & child health, 2003. **8**(6): p. 363-6.
- 45 24. Badenhorst, W. and P. Hughes, *Psychological aspects of perinatal loss.* Best practice &
- 46 research. Clinical obstetrics & gynaecology, 2007. **21**(2): p. 249-59.
- 47 25. Stroebe, M., H. Schut, and W. Stroebe, *Health outcomes of bereavement.* Lancet, 2007.
- 48 **370**(9603): p. 1960-73.
- 49 26. Song, J., et al., *Long-term Effects of Child Death on Parents' Health Related Quality of Life:*
- 50 *A Dyadic Analysis.* Family relations, 2010. **59**(3): p. 269-282.
- 51
- 52
- 53
- 54
- 55
- 56
- 57
- 58
- 59
- 60

- 1
- 2
- 3
- 4 27. Steinberg, J.R., *Later abortions and mental health: psychological experiences of women*  
5 *having later abortions--a critical review of research*. Women's health issues : official  
6 publication of the Jacobs Institute of Women's Health, 2011. **21**(3 Suppl): p. S44-8.
- 7 28. Daugirdaite, V., O. van den Akker, and S. Purewal, *Posttraumatic stress and*  
8 *posttraumatic stress disorder after termination of pregnancy and reproductive loss: a*  
9 *systematic review*. J Pregnancy, 2015. **2015**: p. 646345.
- 10 29. Gold, K.J., et al., *Depression and Posttraumatic Stress Symptoms After Perinatal Loss in a*  
11 *Population-Based Sample*. J Womens Health (Larchmt), 2016. **25**(3): p. 263-9.
- 12 30. Duncan, C. and J. Caciatore, *A Systematic Review of the Peer-Reviewed Literature on*  
13 *Self-Blame, Guilt, and Shame*. Omega (Westport), 2015. **71**(4): p. 312-42.
- 14 31. Calderon-Margalit, R., et al., *Late stillbirths and long-term mortality of mothers*.  
15 *Obstetrics and gynecology*, 2007. **109**(6): p. 1301-8.
- 16 32. Hvidtjorn, D., et al., *Mortality in mothers after perinatal loss: a population-based follow-*  
17 *up study*. BJOG, 2015.
- 18 33. Blackmore, E.R., et al., *Previous prenatal loss as a predictor of perinatal depression and*  
19 *anxiety*. The British journal of psychiatry : the journal of mental science, 2011. **198**(5):  
20 p. 373-8.
- 21 34. DeBackere, K.J., P.D. Hill, and K.L. Kavanaugh, *The parental experience of pregnancy*  
22 *after perinatal loss*. Journal of obstetric, gynecologic, and neonatal nursing : JOGNN /  
23 NAACOG, 2008. **37**(5): p. 525-37.
- 24 35. Oginska-Bulik, N. and M. Kobylarczyk, *The Experience of Trauma Resulting From the*  
25 *Loss of a Child and Posttraumatic Growth-The Mediating Role of Coping Strategies (Loss*  
26 *of a Child, PTG, and Coping)*. Omega (Westport), 2017: p. 30222817724699.
- 27 36. Guldin, M., *Tab og Sorg - en grundbog for professionelle*. Vol. 1. 2014: Hans Reitzels  
28 Forlag. 320.
- 29 37. Caciatore, J. and S. Bushfield, *Stillbirth: the mother's experience and implications for*  
30 *improving care*. J Soc Work End Life Palliat Care, 2007. **3**(3): p. 59-79.
- 31 38. Wijngaards-de Meij, L., et al., *Patterns of attachment and parents' adjustment to the*  
32 *death of their child*. Pers Soc Psychol Bull, 2007. **33**(4): p. 537-48.
- 33 39. Jaaniste, T., et al., *Risk and Resilience Factors Related to Parental Bereavement Following*  
34 *the Death of a Child with a Life-Limiting Condition*. Children (Basel), 2017. **4**(11).
- 35 40. Bowlby, J., *Attachment (Attachment & Loss)*  
36 *- Volume One of the Attachment and Loss Trilogy (v.1: Attachment Attachment)*. 1997:  
37 Vintage.
- 38 41. Stroebe, M. and H. Schut, *The dual process model of coping with bereavement: rationale*  
39 *and description*. Death Stud, 1999. **23**(3): p. 197-224.
- 40 42. Klass, D., *The deceased child in the psychic and social worlds of bereaved parents during*  
41 *the resolution of grief*. Death Stud, 1997. **21**(2): p. 147-75.
- 42 43. Stroebe, M. and H. Schut, *To continue or relinquish bonds: a review of consequences for*  
43 *the bereaved*. Death Stud, 2005. **29**(6): p. 477-94.
- 44 44. Root, B.L. and J.J. Exline, *The role of continuing bonds in coping with grief: overview and*  
45 *future directions*. Death Stud, 2014. **38**(1-5): p. 1-8.
- 46 45. Janoff-Bulman, R., *Shattered Assumptions*. 1992, New York: The Free Pres. 209.
- 47 46. Møller, R.N.M., *Foetus Mortuus*. 2015.
- 48 47. Hvidt, N.C., et al., *Faith Moves Mountains-Mountains Move Faith: Two Opposite*  
49 *Epidemiological Forces in Research on Religion and Health*. J Relig Health, 2017. **56**(1):  
50 p. 294-304.
- 51
- 52
- 53
- 54
- 55
- 56
- 57
- 58
- 59
- 60

- 1
- 2
- 3
- 4 48. Prinds, C., et al., *Existential meaning among first-time full-term and preterm mothers: a questionnaire study*. J Perinat Neonatal Nurs, 2014. **28**(4): p. 271-9.
- 5
- 6 49. Prinds, C., et al., *Prayer and meditation among Danish first time mothers-a questionnaire study*. BMC Pregnancy Childbirth, 2016. **16**: p. 8.
- 7
- 8 50. Harris, P.A., et al., *Research electronic data capture (REDCap)--a metadata-driven methodology and workflow process for providing translational research informatics support*. J Biomed Inform, 2009. **42**(2): p. 377-81.
- 9
- 10
- 11 51. Fraley, R.C., et al., *The Experiences in Close Relationships-Relationship Structures questionnaire: a method for assessing attachment orientations across relationships*. Psychol Assess, 2011. **23**(3): p. 615-25.
- 12
- 13 52. Ritsher, J.B. and R. Neugebauer, *Perinatal Bereavement Grief Scale: distinguishing grief from depression following miscarriage*. Assessment, 2002. **9**(1): p. 31-40.
- 14
- 15 53. Toedter, L.J., J.N. Lasker, and H.J. Janssen, *International comparison of studies using the perinatal grief scale: a decade of research on pregnancy loss*. Death Stud, 2001. **25**(3): p. 205-28.
- 16
- 17 54. Caserta, M.S. and D.A. Lund, *Toward the development of an inventory of daily widowed life (IDWL): guided by the dual process model of coping with bereavement*. Death Stud, 2007. **31**(6): p. 505-35.
- 18
- 19 55. Blevins, C.A., et al., *The Posttraumatic Stress Disorder Checklist for DSM-5 (PCL-5): Development and Initial Psychometric Evaluation*. J Trauma Stress, 2015. **28**(6): p. 489-98.
- 20
- 21 56. Rubin, S.S., et al., *The two-track model of bereavement questionnaire (TTBQ): development and validation of a relational measure*. Death Stud, 2009. **33**(4): p. 305-33.
- 22
- 23 57. Prigerson, H.G., et al., *Prolonged grief disorder: Psychometric validation of criteria proposed for DSM-V and ICD-11*. PLoS Med, 2009. **6**(8): p. e1000121.
- 24
- 25 58. Survey, W.V., *World Values Survey*. 2006.
- 26
- 27 59. UVVU, U.V.V.U., *Vejledninger i God Videnskabelig Praksis med særlig fokus på sundhedsvidenskab, naturvidenskab og teknisk videnskab*. 2009.
- 28
- 29 60. Dyregrov, K., *Bereaved parents' experience of research participation*. Social Science and Medicine, 2004. **58**: p. 391-400.
- 30
- 31 61. Breeze, A.C., et al., *Attitudes to perinatal postmortem: parental views about research participation*. Journal of medical ethics, 2011. **37**(6): p. 364-7.
- 32
- 33
- 34
- 35
- 36
- 37
- 38
- 39
- 40
- 41
- 42
- 43
- 44
- 45
- 46
- 47
- 48
- 49
- 50
- 51
- 52
- 53
- 54
- 55
- 56
- 57
- 58
- 59
- 60

# BMJ Open

**Life after loss**  
**Protocol for a Danish longitudinal follow-up study unfolding**  
**life and grief after the death of a child during pregnancy**  
**from gestational week 14, during birth or in the first 4**  
**weeks of life**

|                                 |                                                                                                                                                                                                                                                                                                                                                                                                                                                                                                                                                                                        |
|---------------------------------|----------------------------------------------------------------------------------------------------------------------------------------------------------------------------------------------------------------------------------------------------------------------------------------------------------------------------------------------------------------------------------------------------------------------------------------------------------------------------------------------------------------------------------------------------------------------------------------|
| Journal:                        | <i>BMJ Open</i>                                                                                                                                                                                                                                                                                                                                                                                                                                                                                                                                                                        |
| Manuscript ID                   | bmjopen-2018-024278.R2                                                                                                                                                                                                                                                                                                                                                                                                                                                                                                                                                                 |
| Article Type:                   | Protocol                                                                                                                                                                                                                                                                                                                                                                                                                                                                                                                                                                               |
| Date Submitted by the Author:   | 06-Nov-2018                                                                                                                                                                                                                                                                                                                                                                                                                                                                                                                                                                            |
| Complete List of Authors:       | Hvidtjørn, Dorte; Syddansk Universitet Det Sundhedsvidenskabelige Fakultet, Department of Clinical Research; Odense Universitetshospital, Gynaecology And Obstetrics<br>Prinds, Christina; Syddansk Universitet Det Sundhedsvidenskabelige Fakultet, Department of Clinical Research<br>Bliddal, Mette; University of Southern Denmark, OPEN<br>Henriksen, Tine; Aarhus Universitetshospital, Department of Paediatrics<br>Cacciatore, Joanne; Arizona State University, School of Social Work<br>O'Connor, Maja; Aarhus University, Department of Psychology and Behavioural Sciences |
| <b>Primary Subject Heading</b>: | Evidence based practice                                                                                                                                                                                                                                                                                                                                                                                                                                                                                                                                                                |
| Secondary Subject Heading:      | Obstetrics and gynaecology, Health services research, Mental health, Patient-centred medicine                                                                                                                                                                                                                                                                                                                                                                                                                                                                                          |
| Keywords:                       | Perinatal Death, Grief, Cohort Study, Life Change Events, Quality of health care                                                                                                                                                                                                                                                                                                                                                                                                                                                                                                       |
|                                 |                                                                                                                                                                                                                                                                                                                                                                                                                                                                                                                                                                                        |

SCHOLARONE™  
Manuscripts

## Life after loss

### Protocol for a Danish longitudinal follow-up study unfolding life and grief after the death of a child during pregnancy from gestational week 14, during birth or in the first 4 weeks of life

Dorte Hvidtjørn [dhvidtjoern@health.sdu.dk](mailto:dhvidtjoern@health.sdu.dk),<sup>1,2</sup> Christina Prinds [cprinds@health.sdu.dk](mailto:cprinds@health.sdu.dk),<sup>1,3</sup> Mette Bliddal [mette.bliddal@rsyd.dk](mailto:mette.bliddal@rsyd.dk),<sup>4</sup> Tine Brink Henriksen [tine.brink.henriksen@clin.au.dk](mailto:tine.brink.henriksen@clin.au.dk),<sup>5,6</sup> Joanne Cacciatore [jcaccia@me.com](mailto:jcaccia@me.com),<sup>7</sup> Maja O'Connor [maja@psy.au.dk](mailto:maja@psy.au.dk)<sup>8</sup>

1) Research Unit for Gynecology and Obstetrics, Institute of Clinical Research, University of Southern Denmark and Odense University Hospital, Odense, Denmark, 2) Unit for Perinatal Loss, Department of Gynecology and Obstetrics, Aarhus University Hospital, Aarhus, Denmark, 3) Midwifery College, University College South Denmark, Esbjerg, Denmark, 4) OPEN Odense Patient Data Explorative network, University of Southern Denmark and Odense University Hospital, Odense, Denmark, 5) Perinatal Epidemiology Research Unit, Aarhus University Hospital, Aarhus, Denmark, 6) Department of Pediatrics, Aarhus University Hospital, Aarhus, Denmark, 7) School of Social Work, Arizona State University, Arizona, USA, 8) Department of Psychology and Behavioral Sciences, Aarhus University, Aarhus, Denmark

Keywords: Perinatal Death, Grief, Cohort Study, Life Change Events, Quality of Health Care

Corresponding author: Dorte Hvidtjørn [dhvidtjoern@health.sdu.dk](mailto:dhvidtjoern@health.sdu.dk)

Word count:

## Abstract

**Introduction:** After the death of a child during pregnancy, birth or in the neonatal period, parents often experience feelings of guilt, disenfranchisement, feelings of betrayal by one's own body and envy of others. Such bereavement results in high rates of distress: psychologically, emotionally, physiologically and existentially. These data are collected using a national, longitudinal cohort to assess grief in mothers and their partners after the death of a child during pregnancy, birth, or in the neonatal period. Our aim is to achieve a general description of grief, emotional health, and existential values after pregnancy or perinatal death in a Danish population.

1  
2  
3  
4 **Methods and analysis:** The cohort comprises mothers and their partners in Denmark who lose a  
5  
6 child during pregnancy from gestational week 14, during birth or in the neonatal period (4 weeks  
7  
8 post partum). We began data collection in 2015 and plan to continue until 2024. The aim is to  
9  
10 include 5,000 participants by 2024, generating the largest cohort in the field to date. Parents are  
11  
12 invited to participate at the time of hospital discharge or via the Patient Associations homepage.  
13  
14 Data are collected using web-based questionnaires distributed at 1-2, 7 and 13 months after the  
15  
16 loss. Socio-demographic and obstetric variables are collected. Validated psychometric measures  
17  
18 covering attachment, continuing bonds, posttraumatic stress, prolonged grief, perinatal grief and  
19  
20 existential values were chosen to reach our aim.  
21  
22  
23  
24

25  
26 **Ethics and dissemination:** The study was approved by The Danish National Data Protection Agency  
27  
28 (No. 18/15684, October 7, 2014). The results will be disseminated in peer-review and professional  
29  
30 journals as well as in layman magazines, lectures and radio broadcasts.  
31  
32  
33  
34  
35  
36

## 37 **Strengths and limitations**

- 38 • A comprehensive population based longitudinal study targeting at 5,000 participants
  - 39 • Using multiple validated, self-administered questionnaires enabling studies within  
40 attachment, continuing bonds, posttraumatic stress, prolonged grief, perinatal grief,  
41 existential values and the quality of health services
  - 42 • Multi-professional approach including psychologist, midwives, perinatal epidemiologists and  
43 anthropologists ensuring a resourceful approach
  - 44 • A robust response rate around 50%
- 45  
46  
47  
48  
49  
50  
51  
52  
53  
54  
55  
56  
57  
58  
59  
60

- Representativeness and nonparticipation will be assessed according to age, parity, gestational age at birth and type of loss

## Introduction

When we lose a person we love, we grieve. Grief is a simultaneously universal phenomenon and yet an entirely individual experience. Grief is also a cultural phenomenon, influenced by alternating normativity and beliefs over time.[1] In contemporary Western countries, grief and suffering are increasingly embedded in medical and psychiatric paradigms.[2, 3] For example, the World Health Organization is preparing criteria for a new diagnosis termed Prolonged Grief Disorder (PGD), anticipated to be introduced in the diagnostic manuals for mental disorders in 2018.[4] Discussions about how to define pathological grief are actualized both in professional settings and the broader population.[5-8] There is general agreement that the majority of bereaved individuals eventually, and without professional interventions, will arrive at a new emotional equilibrium after loss. According to Litz et al only a minority will experience PGD, suffering significant impairment in important areas of daily life to a disabling degree more than six months after loss.[9] A recent meta-analysis found a prevalence of PGD in approximately 10% in bereaved adults, however only a small fraction of the bereaved in these 14 studies included bereaved parents.[10]

Thus, it is not clear how well these findings apply to the grieving process among parents after the death of a baby. Their grieving process might differ from grief processes in general, and a larger proportion may experience the symptoms of PGD. Put differently, a longer period of intense grief may be the normal response for parents grieving after the death of a baby. This hypothesis forms the basis of this longitudinal, follow-up study where we aim to assess grief among mothers and partners after the loss of a child during pregnancy from gestational week 14, during

1  
2  
3  
4 birth or in the neonatal period (4 weeks post partum). We include miscarriages, termination of  
5  
6 pregnancy due to fetal anomaly (TOPFA), and the death of babies due to stillbirths and neonatal  
7  
8 deaths.  
9

### 10 11 12 **The nature of perinatal grief** 13

14  
15 The death of a baby can be a life-changing and devastating experience.[11] A growing body of  
16  
17 literature has assessed the nature of grief among parents who lose a child during pregnancy, birth,  
18  
19 or in the neonatal period. One meta-analysis analyzing 144 studies about parental grief  
20  
21 demonstrates that the majority of studies originate in North America, followed by Great Britain,  
22  
23 Sweden and Australia.[12] Findings conclude that loss from miscarriage, stillbirth, TOPFA or  
24  
25 neonatal death often involves feelings of guilt, disenfranchisement, feelings of betrayal by ones  
26  
27 body and envy of others.[12, 13] Parents lose the prospect of an entire life with the child and all the  
28  
29 moments they dreamt of sharing.[14] Furthermore, bereaved parents of young babies who die have  
30  
31 few mementoes of the child, none or few pictures and a very short narrative.[15] The loss has been  
32  
33 called “invisible” and especially if the child died before or during birth family and friends might not  
34  
35 regard the child as real. They may also be reluctant to talk about the dead child, leading to emotional  
36  
37 isolation complicating the grief process.[12, 16, 17] Some parents, mostly mothers, describe a loss  
38  
39 of self-esteem.[14, 16, 18, 19] For the mother, the bodily unity with the dead child might be still  
40  
41 another stressful element.[20] For parents choosing TOPFA feelings of guilt and doubt can further  
42  
43 thwart the grief process.[21, 22]  
44  
45  
46  
47  
48  
49  
50

### 51 52 **Outcomes of pregnancy and perinatal bereavement** 53

54  
55 The outcomes of pregnancy and perinatal bereavement are also assessed in international studies,  
56  
57 finding high rates of psychological and emotional distress and diagnoses including; major depressive  
58  
59  
60

1  
2  
3  
4 disorder, general anxiety disorder, post traumatic stress disorder (PTSD), sense of failure, long-term  
5  
6  
7 guilt and intense grief for more than 2 years.[12, 20, 23, 24]  
8

9  
10 Generally, measured by similar instruments mothers appear to be more afflicted than  
11  
12 fathers.[23, 25, 26] A review of 11 studies assessed the association between type of loss and mental  
13  
14 health and found lower or comparable levels of depression, anxiety and PTSD among mothers losing  
15  
16 a child from TOPFA and mothers losing a child from stillbirth.[27] The risk for PTSD was assessed in  
17  
18 a systematic review of 48 studies. They found an increasing risk of PTSD related to higher gestational  
19  
20 age at time of loss and certain socio-demographic and psychosocial characteristics predicting  
21  
22 PTSD.[28] Unsurprisingly, the PTSD risk appears to be 7 times higher in mothers after a perinatal  
23  
24 death compared to mothers with a live birth.[29] A review of 18 studies on self-blame, guilt, and  
25  
26 shame among bereaved parents (including stillbirths and the loss of older children) showed a high  
27  
28 prevalence of all three states and an association with grief intensity.[30] Higher mortality rates from  
29  
30 natural causes among mothers who experienced a perinatal death were found in two large  
31  
32 population based studies established on register data.[31, 32]  
33  
34  
35  
36  
37

38  
39 Explorations of subsequent pregnancy following the loss suggest that some mothers  
40  
41 are at an increased risk of depression and anxiety.[33, 34] Patient-centered compassionate care is  
42  
43 valued by the parents,[20] but we identified no studies assessing the long term effect of the type of  
44  
45 care provided at the hospital.  
46  
47

48  
49 Despite the above-mentioned outcomes, some bereaved parents describe the loss as  
50  
51 a pivotal event in a broader and more life-changing sense. Grief can make an existential imprint on  
52  
53 the bereaved parents potentially leading to both posttraumatic growth as well as posttraumatic  
54  
55 stress, which is often mentioned in the literature.[11, 35-37]  
56  
57  
58  
59  
60

## The theoretical framework

In this section we explicate the theoretical framework, which piloted the preparation of the questionnaires and the forthcoming data analyses.

In general, unexpected and traumatic loss increases the risk of impaired physical and emotional health in the bereaved, and the loss of a child in the perinatal period will most often be unexpected and traumatic.[25]

Attachment style is shown to be related to adaption to the loss with more intense and enduring symptoms of grief and depression, complicated grief reactions, and decreased resilience in parents with an insecure attachment style (on both avoidance and anxiety attachment).[38, 39] Attachment theory, first introduced by John Bowlby in the 1970s, provides a unique way to characterize individual differences in reactions to loss because it illuminates the nature of a person's relationships and adjustment in situations of separation.[38] Different styles of attachment, developed through the early parent-child relationship, will form the basis for responses to emotionally distressing situations such as bereavement.[40]

The Dual Process Model (DPM) has become a widespread model in understanding grief in contemporary Western countries.[41] The DPM emphasizes two concurrent types of stressors and coping processes: loss-oriented and restoration-oriented. It underscores that bereaved individuals often oscillate between these two processes throughout the course of bereavement, and a standstill in one of the two processes might be associated with prolonged grief.[41]

In Freud's classic grief work theory, detachment from the person who died is emphasized as fundamental for adaption to the loss and this idea has influenced the attitude of society and bereaved individuals for nearly 100 years. This philosophy is now challenged by the continuing bonds theory.[42] Continuing bonds has been defined as *"the presence of an on-going*

1  
2  
3  
4 *inner relationship with the deceased person by the bereaved individual*" representing diverse  
5  
6 behaviors.[43] The literature reveals contradictory findings of the role of continuing bonds in  
7  
8 bereavement, with certain types of continuing bonds associated with both adaptive and  
9  
10 maladaptive adjustment in various studies. Moreover, outcomes are influenced by the social and  
11  
12 cultural acceptance of grieving individuals and their continued relationship with the deceased.[44]  
13  
14  
15

16  
17 When a child dies at birth the natural order of life is disturbed and assumptive  
18  
19 worldviews shatter, challenging three primary core beliefs relating to benevolence, meaningfulness  
20  
21 of the world and worthiness of the self, and requiring a reorganization of worldviews.[11, 45] This  
22  
23 disruption of core belief might lead to changes in philosophy of life or spiritual beliefs.[11] These  
24  
25 changes may be perceived as helpful or unhelpful, as the literature shows incongruent findings in  
26  
27 how religiosity and spirituality relate to bereavement outcomes.[39]  
28  
29  
30

### 31 32 **The Danish setting**

33  
34 There are huge dissimilarities between the health care systems in Denmark and North America from  
35  
36 where most of the studies originate. Danish health care is publicly available and free. Furthermore,  
37  
38 there are different approaches in the way healthcare professionals support bereaved parents in  
39  
40 creating a relationship with their dead child and acknowledging their grief.[12, 46] Additionally,  
41  
42 patient centered psychosocial care is a basic standard of care in Danish hospitals, while the  
43  
44 prescription of psychiatric medication appears to be much more common in the U.S.[3, 46]  
45  
46 Specifically, when we explore existential values and spiritual beliefs, findings from more religious  
47  
48 countries, such as the U.S., have poor external validity when compared to a secularized country such  
49  
50 as Denmark.[47-49] Hence, studies in a Danish context can expand our knowledge on grief after  
51  
52 perinatal death.  
53  
54  
55  
56  
57  
58  
59  
60

## Aim

In this longitudinal national follow-up study, we aim to assess grief symptoms among mothers and partners after the loss of a child during pregnancy, birth, or in the neonatal period. We aim to achieve a general description of grief, emotional health, and existential values after pregnancy or neonatal loss in a Danish population.

To achieve our objectives, we based the study on the following overall research questions:

1. How does the process of grief change for bereaved parents in the first 13 months after the loss?
2. What, if any, gender differences exist in the grief process?
3. How is attachment style associated with continuing bonds and grief?
4. Does gestational age at the time of death influence grief?
5. Does the loss change existential or spiritual values or practices?

## Methods and analysis

This nationwide population based cohort study comprises mothers and partners who lost a child during pregnancy after gestational week 14, during or after birth or in the neonatal period. We include miscarriage, TOPFA, stillbirth and neonatal death. In Denmark, a regional counsel can grant permission to perform TOPFA until GA week 22; stillbirth is defined as intrauterine fetal death from GA week 22. We use web-based questionnaires distributed at three specific time points in the first 13 months after the loss. Study data were collected and managed using REDCap electronic data capture tools hosted at University of Southern Denmark.[50] Mothers and their partners are asked to reply to the questionnaires individually.

1  
2  
3  
4 Data collection started in the Region of Southern Denmark in January 2016 and in the  
5  
6 Region of Central Jutland in January 2017. In the summer of 2018 we expanded the study nationally  
7  
8 and included the remaining three regions in Denmark. Data collection was permitted by The Danish  
9  
10 Data Protection Agency until January 2025.  
11  
12

13  
14 In the Regions of Southern Denmark and Central Jutland, parents receive short written  
15  
16 and verbal information from healthcare professionals about the study before leaving hospital.  
17  
18 Subsequently they receive the first e-mail from the project manager 4 to 8 weeks after the loss with  
19  
20 comprehensive information about the study and a link to the questionnaire. In the rest of Denmark,  
21  
22 parents are invited to participate through announcements on the homepage for the national patient  
23  
24 organization "Landsforeningen Spædbarnsdød". This agency offers free counseling to perinatally  
25  
26 bereaved families. Via a link at the homepage, parents sign up with an e-mail address and receive  
27  
28 comprehensive information and a questionnaire. Access to the study questionnaire is given only  
29  
30 when the parents have consented to participation.  
31  
32  
33  
34  
35

36 The questionnaire is sent to parents at three time points: 4 to 8 weeks, 7, and 13  
37  
38 months after the loss. If not returned, each questionnaire is followed by reminders, the first one  
39  
40 after 3 weeks and the second one after 6 weeks. Due to an initial low response rate, we further  
41  
42 introduced a verbal reminder in January 2018 via a telephone call made by a research assistant with  
43  
44 experience in grief counseling. In the Region of Southern Denmark, basic information (age, date of  
45  
46 birth, date of death, gestational age at birth, parity and type of loss) on all potential participants are  
47  
48 registered, allowing us to conduct a dropout analysis.  
49  
50  
51  
52  
53

#### 54 **The questionnaires**

55

56 The survey was constructed with a combination of basic information in relation to socio-  
57  
58 demographics and obstetric variables, state-of-the-art psychometrical testing by validated  
59  
60

1  
2  
3  
4 questionnaires and ad hoc questions specifically prepared for this study. We included seven  
5  
6 psychometric scales addressing the different aspects of our research questions (Table 1).  
7  
8  
9

### 10 **Socio-demographic variables**

11  
12 We included the following socio-demographic variables: age, sex of partner (to identify female  
13 partners), marital status (married, co-habiting, single), educational level (basic school (9–10 years  
14 of education), intermediate length education (11–16 years of education) and university education  
15 (17 or more years of education), present occupation and occupation before the loss (on maternity  
16 leave, on sick leave, unemployed, at work or studying).  
17  
18  
19  
20  
21  
22  
23  
24

### 25 **Obstetric and organizational variables**

26  
27 The following obstetrical variables were included: previous perinatal loss, parity, assisted  
28 reproduction, single- or multiple pregnancies, type of loss (missed abortion, miscarriage, TOPFA,  
29 stillbirth, death after birth), mode of birth (vaginal vs. cesarean section), gestational age at the time  
30 of loss, admission to the neonatal intensive care unit (NICU), and age of child if death occurred after  
31 birth, and seeing and holding the dead child. Organizational variables were: hospital and type of  
32 department to which the couple was admitted, and experienced quality of psychosocial support  
33 (midwives, doctors, nurses, social worker, undertaker, religious person (chaplain, imam or other)  
34 and patient organization).  
35  
36  
37  
38  
39  
40  
41  
42  
43  
44  
45  
46  
47

### 48 **Psychometric scales**

49  
50 To measure attachment style we included a version of "The Experience in Close Relationships Scale  
51 – revised, short form (ECR-R)" modified to bereaved samples.[51] Participants were asked to express  
52 how much they agreed or disagreed with 12 statements concerning how they feel in emotionally  
53 intimate relationships on a seven-point scale ranging from highly disagree to strongly agree. Scores  
54  
55  
56  
57  
58  
59  
60

1  
2  
3  
4 for attachment related anxiety and attachment related avoidance were obtained by averaging a  
5  
6 person's scores (0 to 6) on each of the 12 items and the composite scores for anxiety and avoidance  
7  
8  
9 were highly reliable (alpha score  $>.80$ ) despite based on a small number of items.[51]  
10

11 We used the Perinatal Grief Scale (PGS) developed in 1988 to construct a  
12  
13 comprehensive measure of perinatal grief to facilitate comparison among findings in the field.[13,  
14  
15 52] The scale was constructed to address the potential disparities between nonspecific grief and  
16  
17 perinatal grief.[13] The PGS contains 33 statements covering dimensions as e.g. guilt, loneliness,  
18  
19 and jealousy with an option of answering on a five-point scale ranging from highly disagree to  
20  
21 strongly agree. The PGS has good internal consistency (alpha 0.95).[53] A clinical cut-off of 91 has  
22  
23 been established for the PGS, where greater scores indicate a high level of perinatal grief.[53]  
24  
25  
26  
27

28 To assess the process of bereavement within the DPM paradigm, the Inventory of Daily  
29  
30 Widowed Life (IDWL) was used.[54] The IDWL was developed studying a group of widows in 2007.  
31  
32 However, items in the scale could be adaptable to other losses and relationships with some  
33  
34 modifications.[54] The inventory comprises 15 items on doings, thoughts, or feelings and the  
35  
36 participants answer how often within the last week they have been preoccupied by each task by  
37  
38 choosing one of four categories; seldom or never, sometimes, quite often and nearly all the time.  
39  
40 IDWL was developed to measure the processes of loss-orientation (LO) and restoration-orientation  
41  
42 (RO) and the oscillation between. The LO and RO subscales produced alpha coefficients of .90 and  
43  
44 .79, respectively.[54]  
45  
46  
47  
48  
49

50 We also included the Post Traumatic Stress Disorder Checklist (PCL-PTSD).[55] The PCL  
51  
52 was developed in 1990 and comprises 17 items corresponding to the PTSD symptom criteria in the  
53  
54 Diagnostic and Statistical Manual of Mental Disorders (5th ed.).[55] Respondents indicate how  
55  
56 much they have been bothered by each PTSD symptom over the past month, using a 5-point scale  
57  
58  
59  
60

1  
2  
3  
4 ranging from not at all to extremely (scores 1 to 5). PCL scores exhibited strong internal consistency  
5  
6  
7 ( $\alpha = .94$ ), and test-retest reliability ( $r = .82$ ).[55]  
8

9 To address the question of continuing bonds, we included “The Two Track  
10 Bereavement Questionnaire on Life Following Loss”.[56] This model aims to devote balanced  
11 attention to two domains of the bereavement experience: the nature of biopsychosocial functioning  
12 and the nature of the ongoing relationship to the deceased. Construct and concurrent validity were  
13 examined and were found satisfactory.[56]  
14  
15  
16  
17  
18  
19

20 In order to assess the likelihood of symptoms related to the diagnosis of PGD within  
21 this cohort, we incorporated Prolonged Grief Disorder-13.[57] The scale includes 13 items related  
22 to feelings, thoughts and behaviors. High scores within the specific items associated with severe  
23 functional impairment fulfill the criterion for PGD. Item response theory analyses derived the most  
24 informative, unbiased PGD symptoms, combination analyses identified the most sensitive and  
25 specific PGD algorithm and the scale was then tested finding high psychometric validity.  
26  
27  
28  
29  
30  
31  
32  
33  
34

35 We also included questions from “The European Value Survey”,[58] supplemented by  
36 questions on worldviews, existential values, and spiritual beliefs developed for a study on existential  
37 meaning and motherhood.[48] The questions addressed alterations in meaning and purpose in life,  
38 religious faith, belief in afterlife, church attendance, prayer, and meditation and whether there was  
39 a need (met or unmet) for discussing these existential matters with others.  
40  
41  
42  
43  
44  
45  
46  
47

48 **Table 1.** Overview of domains and psychometric scales included in the three questionnaires,  
49 showing the number of questions within the specific scales at specific times.  
50  
51  
52

| Scales              | Questionnaire 1 | Questionnaire 2 | Questionnaire 3 |
|---------------------|-----------------|-----------------|-----------------|
| Time since the loss | 24-60 days      | 7 months        | 13 months       |

|                                                                                                                          |            |            |            |
|--------------------------------------------------------------------------------------------------------------------------|------------|------------|------------|
| Socio-demographic and obstetric variables                                                                                | 22         |            |            |
| The Inventory of Daily Widowed Life (IDWL) (Caserta & Lund, 2007)                                                        | 15         | 15         | 15         |
| The Two Track Bereavement Questionnaire on Life Following Loss (TTBQ) (Rubin et al., 2009)                               | 60         | 60         | 60         |
| The Experience in Close Relationships Scale – revised, short form (ECR-R) (Fraley, Heffernan, Vicary, & Brumbaugh, 2011) | 12         |            |            |
| Selected questions from The European Value Survey (Survey, 2006)                                                         | 23         |            | 23         |
| Prolonged Grief Disorder (PG-13) [57]                                                                                    | 13         | 13         | 13         |
| Post Traumatic Stress Disorder Checklist (PCL-PTSD) (Blevins, Weathers, Davis, Witte, & Domino, 2015)                    | 17         | 17         | 17         |
| Perinatal Grief Scale (PGS), Toedter et al., 1988)                                                                       | 33         | 33         | 33         |
| <b>Total number of questions</b>                                                                                         | <b>195</b> | <b>138</b> | <b>161</b> |

### Preparation and pilot test

The first author and a research assistant (L Bilenberg Pedersen) translated the psychometric scales into English: PGS, TTBQ, and PCL from English to Danish and the last author back translated to English after which consensus was reached based on the original and back translated versions of the scales. The survey was tested for comprehensibility by seven health care professionals with experience in the field of bereavement, and 18 parents, mostly mothers, with a previous loss of a young child. The final survey was adjusted according to their evaluation and comments.

### Data analyses plan

By January 1, 2018 we had received 300 completed first questionnaires. We estimate that 800 parents in Denmark every year will experience a loss from GA week 14 up to four weeks after birth. With the data collection now on-going in all of Denmark, we expect to include 400 mothers and 240 partners every year, with an estimated response rate of 50% among mothers and 30% among partners. We anticipate approximately 5,000 participants by January 2024, comprising the largest cohort in this field to date.

In the region of Southern Denmark, we have the following information on non-responders: mother/partner, age, date contacted, parity, gestational age at birth and age at death, whether the loss was TOPFA, miscarriage, stillbirth or death post partum, and whether the participant wanted to take part in a bereavement support group. We will describe the non-responders/responders according to these variables.

We expect to enroll the first PhD student in September 2018 in a study focusing on attachment style and continuing bonds.

### Statistical analysis plan

The characteristics of the cohort will be described by means and interquartile ranges for continuous data and by frequencies with 95% confidence interval for categorized and dichotomized data. Hypotheses will be modeled and tested using logistic regression models for dichotomous outcomes and ordinal logistic regression models where the dependent variable is based on ordinal data according to e.g. type of attachment, gender of the bereaved, or type of loss. We will use mixed effect models to examine time trends when examining changes over time in

1  
2  
3  
4  
5  
6  
7  
8  
9  
10  
11  
12  
13  
14  
15  
16  
17  
18  
19  
20  
21  
22  
23  
24  
25  
26  
27  
28  
29  
30  
31  
32  
33  
34  
35  
36  
37  
38  
39  
40  
41  
42  
43  
44  
45  
46  
47  
48  
49  
50  
51  
52  
53  
54  
55  
56  
57  
58  
59  
60

answering the same questions up to three times. All analyses will be adjusted for relevant socio-demographic and medical covariates depending on the underlying hypothesis. Data will be analyzed using STATA version 15.0 (StatCorp, Texas, USA).

### Patient and Public Involvement

Eighteen parents who had previously lost a baby tested the questionnaire and their priorities, experience, and preferences were taken into account in the final version of the survey. The patient organization “Landsforeningen Spædbarnsdød” played a very active part in the design of the study. The study has a homepage where published papers will be presented to ensure that participants have access to the results:

[https://www.sdu.dk/da/om\\_sdu/institutter\\_centre/klinisk\\_institut/forskning/forskningsenheder/gynaekologjobstetrik/forskningsprojekter/liveteft\\_ertabet](https://www.sdu.dk/da/om_sdu/institutter_centre/klinisk_institut/forskning/forskningsenheder/gynaekologjobstetrik/forskningsprojekter/liveteft_ertabet)

### Ethics and dissemination

The project will be enacted according to the recommendations for good scientific practice.[59] The Danish National Data Protection Agency has approved the project (permit number 2008-58-0035, October 7, 2014) with a data collection till 2024. Bereaved parents are a particularly vulnerable population and inviting them to partake in research requires specific ethical considerations. However, studies show that bereaved parents find partaking in research projects to be an positive experience,[60] motivated by an aspiration to help other parents,[60, 61] Participation was voluntary, anonymous and confidential. No incentives or compensation were offered. Participants gave their consent by ticking a box stating confirmation to participate in the study and afterwards access to the questionnaire itself was given.

1  
2  
3  
4 The results will be disseminated in peer-reviewed and professional papers, as well as  
5  
6  
7 in more public layman magazines, lectures and radio broadcasts.  
8  
9  
10

## 11 **Author contributions**

12  
13  
14 Study conception and design: Hvidtjørn, Prinds, Brink Henriksen, Cacciatore and O'Connor

15  
16 Acquisition of data: Hvidtjørn, O'Connor

17  
18  
19 Analysis and interpretation of data: Hvidtjørn, Prinds, Bliddal, Brink Henriksen, Cacciatore and  
20  
21 O'Connor

22  
23  
24 Drafting of manuscript and critical revision: Hvidtjørn, Prinds, Bliddal, Brink Henriksen, Cacciatore  
25  
26 and O'Connor  
27  
28  
29

## 30 **Funding statement**

31  
32  
33 The study was funded by Aase and Ejnar Danielsen's Fund.  
34  
35  
36  
37

## 38 **Competing interests statement**

39  
40 No competing interests.  
41  
42  
43  
44

## 45 **Acknowledgement**

46  
47  
48 We wish to thank "Landsforeningen Spædbarnsdød" and the parents who participated in the design  
49  
50 of the study and the development of the survey.  
51  
52  
53  
54

## 55 **References**

- 56  
57  
58 1. Kofod, E.H., *Grief as a normative phenomenon*. Culture and psychology, 2017. 0(0): p. 1-  
59 15.  
60

1  
2  
3  
4  
5  
6  
7  
8  
9  
10  
11  
12  
13  
14  
15  
16  
17  
18  
19  
20  
21  
22  
23  
24  
25  
26  
27  
28  
29  
30  
31  
32  
33  
34  
35  
36  
37  
38  
39  
40  
41  
42  
43  
44  
45  
46  
47  
48  
49  
50  
51  
52  
53  
54  
55  
56  
57  
58  
59  
60

2. Cacciatore, J. and C. Ruby, *Medicalizing Grief: A Response to Cheng and Shen*. Prim Care Companion CNS Disord, 2015. **17**(6).
3. Lacasse, J.R. and J. Cacciatore, *Prescribing of psychiatric medication to bereaved parents following perinatal/neonatal death: an observational study*. Death Stud, 2014. **38**(6-10): p. 589-96.
4. WHO, I., *6B72 Prolonged grief disorder*. 2016.
5. Maciejewski, P.K., et al., "Prolonged grief disorder" and "persistent complex bereavement disorder", but not "complicated grief", are one and the same diagnostic entity: an analysis of data from the Yale Bereavement Study. World Psychiatry, 2016. **15**(3): p. 266-275.
6. Politikken, *Snart bliver sorg en diagnose*. 2016.
7. Thieleman, K. and J. Cacciatore, *The DSM-5 and the bereavement exclusion: a call for critical evaluation*. Soc Work, 2013. **58**(3): p. 277-80.
8. Maccallum, F., M. Malgaroli, and G.A. Bonanno, *Networks of loss: Relationships among symptoms of prolonged grief following spousal and parental loss*. J Abnorm Psychol, 2017. **126**(5): p. 652-662.
9. Litz, A.H.J.a.B.T., *Prolonged Grief Disorder: Diagnostic, Assessment, and Treatment Considerations* Professional Psychology: Research and Practice, 2014. **45**(3): p. 180-187.
10. Lundorff, M., et al., *Prevalence of prolonged grief disorder in adult bereavement: A systematic review and meta-analysis*. J Affect Disord, 2017. **212**: p. 138-149.
11. Krosch, D.J. and J. Shakespeare-Finch, *Grief, traumatic stress, and posttraumatic growth in women who have experienced pregnancy loss*. Psychol Trauma, 2017. **9**(4): p. 425-433.
12. Burden, C., et al., *From grief, guilt pain and stigma to hope and pride - a systematic review and meta-analysis of mixed-method research of the psychosocial impact of stillbirth*. BMC Pregnancy Childbirth, 2016. **16**: p. 9.
13. Toedter, L.J., J.N. Lasker, and J.M. Alhadeff, *The Perinatal Grief Scale: development and initial validation*. Am J Orthopsychiatry, 1988. **58**(3): p. 435-49.
14. Michon, B., et al., *Death of a child: Parental perception of grief intensity - End-of-life and bereavement care*. Paediatr Child Health, 2003. **8**(6): p. 363-6.
15. Flint, J.C.M., *Mediating Grief: Postmortem Ritualization After Child Death*. Journal of Loss and Trauma, 2011. **17**(2): p. 158-172.
16. Hendrickson, K.C., *Morbidity, mortality, and parental grief: a review of the literature on the relationship between the death of a child and the subsequent health of parents*. Palliative & supportive care, 2009. **7**(1): p. 109-19.
17. Umphrey, L.R. and J. Cacciatore, *Coping with the ultimate deprivation: narrative themes in a parental bereavement support group*. Omega, 2011. **63**(2): p. 141-60.
18. Meert, K.L., C.S. Thurston, and S.H. Briller, *The spiritual needs of parents at the time of their child's death in the pediatric intensive care unit and during bereavement: a qualitative study*. Pediatric critical care medicine : a journal of the Society of Critical Care Medicine and the World Federation of Pediatric Intensive and Critical Care Societies, 2005. **6**(4): p. 420-7.
19. Wonch Hill, P., et al., *The loss of self: The effect of miscarriage, stillbirth, and child death on maternal self-esteem*. Death Stud, 2017. **41**(4): p. 226-235.
20. Cacciatore, J., *Psychological effects of stillbirth*. Semin Fetal Neonatal Med, 2013. **18**(2): p. 76-82.

- 1
- 2
- 3
- 4 21. Korenromp, M.J., et al., *A prospective study on parental coping 4 months after*
- 5 *termination of pregnancy for fetal anomalies*. *Prenatal diagnosis*, 2007. **27**(8): p. 709-
- 6 16.
- 7
- 8 22. Maguire, M., et al., *Grief after second-trimester termination for fetal anomaly: a*
- 9 *qualitative study*. *Contraception*, 2015. **91**(3): p. 234-9.
- 10 23. Michon, B., et al., *Death of a child: Parental perception of grief intensity - End-of-life and*
- 11 *bereavement care*. *Paediatrics & child health*, 2003. **8**(6): p. 363-6.
- 12 24. Badenhorst, W. and P. Hughes, *Psychological aspects of perinatal loss*. *Best practice &*
- 13 *research. Clinical obstetrics & gynaecology*, 2007. **21**(2): p. 249-59.
- 14 25. Stroebe, M., H. Schut, and W. Stroebe, *Health outcomes of bereavement*. *Lancet*, 2007.
- 15 **370**(9603): p. 1960-73.
- 16 26. Song, J., et al., *Long-term Effects of Child Death on Parents' Health Related Quality of Life:*
- 17 *A Dyadic Analysis*. *Family relations*, 2010. **59**(3): p. 269-282.
- 18 27. Steinberg, J.R., *Later abortions and mental health: psychological experiences of women*
- 19 *having later abortions--a critical review of research*. *Women's health issues : official*
- 20 *publication of the Jacobs Institute of Women's Health*, 2011. **21**(3 Suppl): p. S44-8.
- 21 28. Daugirdaite, V., O. van den Akker, and S. Purewal, *Posttraumatic stress and*
- 22 *posttraumatic stress disorder after termination of pregnancy and reproductive loss: a*
- 23 *systematic review*. *J Pregnancy*, 2015. **2015**: p. 646345.
- 24 29. Gold, K.J., et al., *Depression and Posttraumatic Stress Symptoms After Perinatal Loss in a*
- 25 *Population-Based Sample*. *J Womens Health (Larchmt)*, 2016. **25**(3): p. 263-9.
- 26 30. Duncan, C. and J. Cacciato, *A Systematic Review of the Peer-Reviewed Literature on*
- 27 *Self-Blame, Guilt, and Shame*. *Omega (Westport)*, 2015. **71**(4): p. 312-42.
- 28 31. Calderon-Margalit, R., et al., *Late stillbirths and long-term mortality of mothers*.
- 29 *Obstetrics and gynecology*, 2007. **109**(6): p. 1301-8.
- 30 32. Hvidtjorn, D., et al., *Mortality in mothers after perinatal loss: a population-based follow-*
- 31 *up study*. *BJOG*, 2015.
- 32 33. Blackmore, E.R., et al., *Previous prenatal loss as a predictor of perinatal depression and*
- 33 *anxiety*. *The British journal of psychiatry : the journal of mental science*, 2011. **198**(5):
- 34 p. 373-8.
- 35 34. DeBackere, K.J., P.D. Hill, and K.L. Kavanaugh, *The parental experience of pregnancy*
- 36 *after perinatal loss*. *Journal of obstetric, gynecologic, and neonatal nursing : JOGNN /*
- 37 *NAACOG*, 2008. **37**(5): p. 525-37.
- 38 35. Oginska-Bulik, N. and M. Kobylarczyk, *The Experience of Trauma Resulting From the*
- 39 *Loss of a Child and Posttraumatic Growth-The Mediating Role of Coping Strategies (Loss*
- 40 *of a Child, PTG, and Coping)*. *Omega (Westport)*, 2017: p. 30222817724699.
- 41 36. Guldin, M., *Tab og Sorg - en grundbog for professionelle*. Vol. 1. 2014: Hans Reitzels
- 42 Forlag. 320.
- 43 37. Cacciato, J. and S. Bushfield, *Stillbirth: the mother's experience and implications for*
- 44 *improving care*. *J Soc Work End Life Palliat Care*, 2007. **3**(3): p. 59-79.
- 45 38. Wijngaards-de Meij, L., et al., *Patterns of attachment and parents' adjustment to the*
- 46 *death of their child*. *Pers Soc Psychol Bull*, 2007. **33**(4): p. 537-48.
- 47 39. Jaaniste, T., et al., *Risk and Resilience Factors Related to Parental Bereavement Following*
- 48 *the Death of a Child with a Life-Limiting Condition*. *Children (Basel)*, 2017. **4**(11).
- 49 40. Bowlby, J., *Attachment (Attachment & Loss)*
- 50 *- Volume One of the Attachment and Loss Trilogy (v.1: Attachment Attachment)*. 1997:
- 51 *Vintage*.
- 52
- 53
- 54
- 55
- 56
- 57
- 58
- 59
- 60

1  
2  
3  
4  
5  
6  
7  
8  
9  
10  
11  
12  
13  
14  
15  
16  
17  
18  
19  
20  
21  
22  
23  
24  
25  
26  
27  
28  
29  
30  
31  
32  
33  
34  
35  
36  
37  
38  
39  
40  
41  
42  
43  
44  
45  
46  
47  
48  
49  
50  
51  
52  
53  
54  
55  
56  
57  
58  
59  
60

41. Stroebe, M. and H. Schut, *The dual process model of coping with bereavement: rationale and description*. *Death Stud*, 1999. **23**(3): p. 197-224.
42. Klass, D., *The deceased child in the psychic and social worlds of bereaved parents during the resolution of grief*. *Death Stud*, 1997. **21**(2): p. 147-75.
43. Stroebe, M. and H. Schut, *To continue or relinquish bonds: a review of consequences for the bereaved*. *Death Stud*, 2005. **29**(6): p. 477-94.
44. Root, B.L. and J.J. Exline, *The role of continuing bonds in coping with grief: overview and future directions*. *Death Stud*, 2014. **38**(1-5): p. 1-8.
45. Janoff-Bulman, R., *Shattered Assumptions*. 1992, New York: The Free Press. 209.
46. Møller, R.N.M., *Foetus Mortuus*. 2015.
47. Hvidt, N.C., et al., *Faith Moves Mountains-Mountains Move Faith: Two Opposite Epidemiological Forces in Research on Religion and Health*. *J Relig Health*, 2017. **56**(1): p. 294-304.
48. Prinds, C., et al., *Existential meaning among first-time full-term and preterm mothers: a questionnaire study*. *J Perinat Neonatal Nurs*, 2014. **28**(4): p. 271-9.
49. Prinds, C., et al., *Prayer and meditation among Danish first time mothers-a questionnaire study*. *BMC Pregnancy Childbirth*, 2016. **16**: p. 8.
50. Harris, P.A., et al., *Research electronic data capture (REDCap)--a metadata-driven methodology and workflow process for providing translational research informatics support*. *J Biomed Inform*, 2009. **42**(2): p. 377-81.
51. Fraley, R.C., et al., *The Experiences in Close Relationships-Relationship Structures questionnaire: a method for assessing attachment orientations across relationships*. *Psychol Assess*, 2011. **23**(3): p. 615-25.
52. Ritsher, J.B. and R. Neugebauer, *Perinatal Bereavement Grief Scale: distinguishing grief from depression following miscarriage*. *Assessment*, 2002. **9**(1): p. 31-40.
53. Toedter, L.J., J.N. Lasker, and H.J. Janssen, *International comparison of studies using the perinatal grief scale: a decade of research on pregnancy loss*. *Death Stud*, 2001. **25**(3): p. 205-28.
54. Caserta, M.S. and D.A. Lund, *Toward the development of an inventory of daily widowed life (IDWL): guided by the dual process model of coping with bereavement*. *Death Stud*, 2007. **31**(6): p. 505-35.
55. Blevins, C.A., et al., *The Posttraumatic Stress Disorder Checklist for DSM-5 (PCL-5): Development and Initial Psychometric Evaluation*. *J Trauma Stress*, 2015. **28**(6): p. 489-98.
56. Rubin, S.S., et al., *The two-track model of bereavement questionnaire (TTBQ): development and validation of a relational measure*. *Death Stud*, 2009. **33**(4): p. 305-33.
57. Prigerson, H.G., et al., *Prolonged grief disorder: Psychometric validation of criteria proposed for DSM-V and ICD-11*. *PLoS Med*, 2009. **6**(8): p. e1000121.
58. Survey, W.V., *World Values Survey*. 2006.
59. UVVU, U.V.V.U., *Vejledninger i God Videnskabelig Praksis med særlig fokus på sundhedsvidenskab, naturvidenskab og teknisk videnskab*. 2009.
60. Dyregrov, K., *Bereaved parents' experience of research participation*. *Social Science and Medicine*, 2004. **58**: p. 391-400.
61. Breeze, A.C., et al., *Attitudes to perinatal postmortem: parental views about research participation*. *Journal of medical ethics*, 2011. **37**(6): p. 364-7.
